# 1 Extensive Regulatory Changes in Genes Affecting Vocal and 2 Facial Anatomy Separate Modern from Archaic Humans

3  
4 David Gokhman<sup>1</sup>, Lily Agranat-Tamir<sup>1,2</sup>, Genevieve Housman<sup>3,4</sup>, Raquel García-Pérez<sup>5</sup>, Malka  
5 Nissim-Rafinia<sup>1</sup>, Swapan Mallick<sup>6,7,8</sup>, Maria A. Nieves-Colón<sup>3,4</sup>, Heng Li<sup>6</sup>, Songül Alpaslan-  
6 Roodenberg<sup>7</sup>, Mario Novak<sup>9,22</sup>, Hongcang Gu<sup>6</sup>, Manuel Ferrando-Bernal<sup>5</sup>, Pere Gelabert<sup>5</sup>, Iddi  
7 Lipende<sup>10</sup>, Ivanela Kondova<sup>11</sup>, Ronald Bontrop<sup>11</sup>, Ellen E. Quillen<sup>12</sup>, Alexander Meissner<sup>6,13,14</sup>,  
8 Anne C. Stone<sup>3,4,15</sup>, Anne E. Pusey<sup>16</sup>, Deus Mjungu<sup>10</sup>, Leonid Kandel<sup>17</sup>, Meir Liebergall<sup>17</sup>, María  
9 E. Prada<sup>18</sup>, Julio M. Vidal<sup>19</sup>, Kay Prüfer<sup>20</sup>, Johannes Krause<sup>21</sup>, Benjamin Yakir<sup>2</sup>, Svante Pääbo<sup>20</sup>,  
10 Ron Pinhasi<sup>22,23</sup>, Carles Lalueza-Fox<sup>5</sup>, David Reich<sup>6,7,8</sup>, Tomas Marques-Bonet<sup>5,24,25</sup>, Eran  
11 Meshorer<sup>1,26,\*</sup>, Liran Carmel<sup>1,\*</sup>

12  
13 <sup>1</sup> Department of Genetics, The Alexander Silberman Institute of Life Sciences, Faculty of Science, The Hebrew University of  
14 Jerusalem, Edmond J. Safra Campus, Givat Ram, Jerusalem 91904, Israel.

15 <sup>2</sup> Department of Statistics, The Hebrew University of Jerusalem, Jerusalem 91905, Israel.

16 <sup>3</sup> School of Human Evolution and Social Change, Arizona State University, Tempe, AZ 85281, USA.

17 <sup>4</sup> Center for Evolution and Medicine, Arizona State University, Tempe, AZ 85287, USA.

18 <sup>5</sup> Institute of Evolutionary Biology (UPF-CSIC), 08003 Barcelona, Spain.

19 <sup>6</sup> Broad Institute, Cambridge MA 02138, USA.

20 <sup>7</sup> Department of Genetics, Harvard Medical School, Boston, MA 02115, USA.

21 <sup>8</sup> Howard Hughes Medical Institute, Harvard Medical School, Boston, MA 02115, USA.

22 <sup>9</sup> Institute for Anthropological Research, Ljudevita Gaja 32, 10000 Zagreb, Croatia.

23 <sup>10</sup> Gombe Stream Research Center, Jane Goodall Institute, Kigoma, Tanzania.

24 <sup>11</sup> Biomedical Primate Research Center (BPRC), Rijswijk, The Netherlands.

25 <sup>12</sup> Department of Genetics, Texas Biomedical Research Institute, San Antonio, Texas 78242, USA.

26 <sup>13</sup> Harvard Stem Cell Institute, Cambridge, MA 02138 USA.

- 27 <sup>14</sup> Department of Stem Cell and Regenerative Biology, Harvard University, Cambridge, MA 02138 USA
- 28 <sup>15</sup> Institute of Human Origins, Arizona State University, Tempe, AZ 85287, USA.
- 29 <sup>16</sup> Department of Evolutionary Anthropology , Duke University , Durham, NC 27708, USA.
- 30 <sup>17</sup> Orthopaedic Department, Hadassah – Hebrew University Medical Center, Jerusalem, Israel.
- 31 <sup>18</sup> I.E.S.O. ‘Los Salados’. Junta de Castilla y León, Spain.
- 32 <sup>19</sup> Junta de Castilla y León. Servicio de Cultura de León, Spain.
- 33 <sup>20</sup> Department of Evolutionary Genetics, Max Planck Institute for Evolutionary Anthropology, Leipzig D-04103, Germany.
- 34 <sup>21</sup> Max Planck Institute for the Science of Human History, 07745 Jena, Germany.
- 35 <sup>22</sup> Earth Institute and School of Archaeology, University College Dublin, Dublin 4, Ireland.
- 36 <sup>23</sup> Department of Anthropology, University of Vienna, Althanstrasse 14, 1090, Vienna, Austria.
- 37 <sup>24</sup> Catalan Institution of Research and Advanced Studies (ICREA), 08010 Barcelona, Spain.
- 38 <sup>25</sup> Centro Nacional de Análisis Genómico (CRG-CNAG), 08028 Barcelona, Spain.
- 39 <sup>26</sup> The Edmond and Lily Safra Center for Brain Sciences (ELSC), The Hebrew University of Jerusalem, Edmond J. Safra
- 40 Campus, Givat Ram, Jerusalem, 91904, Israel.
- 41
- 42 **Lead Contact: Liran Carmel ([liran.carmel@huji.ac.il](mailto:liran.carmel@huji.ac.il))**

## 43 Summary

44 Changes in gene regulation are broadly accepted as key drivers of phenotypic differences between  
45 closely related species. However, identifying regulatory changes that shaped human-specific traits  
46 is a challenging task. Here, we use >60 DNA methylation maps of ancient and present-day human  
47 groups, as well as six chimpanzees, to detect regulatory changes that emerged in modern humans  
48 after the split from Neanderthals and Denisovans. We show that genes affecting vocalization and  
49 facial features went through particularly extensive methylation changes. Specifically, we identify  
50 silencing patterns in a network of genes (*SOX9*, *ACAN*, *COL2A1* and *NFIX*), and propose that they  
51 might have played a role in the reshaping of human facial morphology, and in forming the 1:1  
52 vocal tract configuration that is considered optimal for speech. Our results provide insights into  
53 the molecular mechanisms that might underlie vocal and facial evolution, and suggest that they  
54 arose after the split from Neanderthals and Denisovans.

55

56 **Keywords:** Epigenetics, Paleoepigenetics, aDNA, Neandertal, Denisova, Gene regulation,  
57 Craniofacial morphology, larynx, vocal cords, voice box

## 58 Introduction

59 The advent of high-quality ancient genomes of archaic humans (Neanderthal and Denisovan)  
60 opened up the possibility to identify the genetic basis of some unique modern human traits (Meyer  
61 et al., 2012; Prüfer et al., 2014). A common approach is to carry out sequence comparisons and  
62 detect non-neutral sequence changes. However, out of ~30,000 substitutions and indels that  
63 reached fixation on the lineage of present-day humans after their separation from archaic humans,  
64 only ~100 directly alter amino acid sequence (Prüfer et al., 2014), and currently, our ability to  
65 estimate the biological effects of the remaining ~30,000 changes is very restricted. Although most  
66 of these noncoding changes are probably nearly neutral, many others may affect gene function,  
67 especially those in regulatory regions like promoters and enhancers. Such regulatory changes may  
68 have sizeable impact on human evolution, as alterations in gene regulation are thought to underlie  
69 much of the phenotypic variation between closely related groups (Fraser, 2013; King and Wilson,  
70 1975). Thus, examining directly DNA regulatory layers such as DNA methylation could enhance  
71 our understanding of the development of human-specific traits far beyond what can be achieved  
72 using sequence comparison alone (Hernando-Herraez et al., 2015a).

73 In order to gain insight into the regulatory changes that underlie human evolution, we previously  
74 developed a method to reconstruct antemortem DNA methylation maps of ancient genomes  
75 (Gokhman et al., 2014) based on analysis of patterns of damage to ancient DNA (Briggs et al.,  
76 2010; Gokhman et al., 2014; Pedersen et al., 2014). We applied this method to reconstruct the  
77 methylomes of a Neanderthal and a Denisovan, which were then compared to a present-day  
78 osteoblast methylation map. However, the ability to identify differentially methylated regions  
79 (DMRs) between the human groups was confined by the incomplete osteoblast reference map

80 (providing methylation information for ~10% of CpG sites), differences in sequencing  
81 technologies, lack of an outgroup and a restricted set of skeletal samples (see Methods). To study  
82 the evolutionary dynamics of DNA methylation along the hominin tree on a larger scale, we  
83 establish here a comprehensive assembly of skeletal DNA methylation maps from modern humans,  
84 archaic humans, and chimpanzees. We then integrate these data with known anatomical effects of  
85 genes (Gokhman et al., 2017a; Köhler et al., 2014), and find that genes that affect vocal, facial,  
86 and pelvic anatomy have gone through extensive DNA methylation changes that are unique to  
87 modern humans.

## 88 Results

89 We reconstructed ancient DNA methylation maps of eight individuals: in addition to the previously  
90 published Denisovan and Altai Neanderthal methylation maps (Gokhman et al., 2014), we  
91 reconstructed the methylome of the Vindija Neanderthal (~40,000 years before present, ybp), and  
92 three methylomes of anatomically modern humans: the Ust'-Ishim individual (~45,000 ybp) (Fu  
93 et al., 2014), the Loschbour individual (~8,000 ybp) (Lazaridis et al., 2014), and the Stuttgart  
94 individual (~7,000 ybp) (Lazaridis et al., 2014). We also sequenced to high-coverage and  
95 reconstructed the methylomes of the La Braña 1 individual (~8,000 ybp, 22x) (which was  
96 previously sequenced to low-coverage (Olalde et al., 2014) and an individual from Anatolia,  
97 Turkey (I1583, 24x, ~8,500 ybp), which was previously sequenced using a capture array  
98 (Mathieson et al., 2015).

99 To this we added 52 publicly available partial bone methylation maps from present-day  
100 individuals, produced using 450K methylation arrays (Horvath et al., 2015; Lohk et al., 2014). To  
101 obtain full present-day bone maps, we produced whole-genome bisulfite sequencing (WGBS)

102 methylomes from the femur bones of two individuals (Bone1 and Bone2). Hereinafter, ancient and  
103 present-day modern humans are collectively referred to as *modern humans* (MHs), while the  
104 Neanderthal and Denisovan are referred to as *archaic humans*. As an outgroup, we produced  
105 methylomes of five chimpanzees (one WGBS and four 850K methylation arrays). Together, these  
106 data establish a unique and comprehensive platform to study DNA methylation dynamics in recent  
107 human evolution (Table S1).

### 108 **Identification of DMRs**

109 Methylation maps may differ due to factors such as sex, age, health, environment, and tissue type.  
110 In addition, the comparison of DNA methylation maps that were produced using different  
111 technologies could potentially introduce artifacts in DMR-detection. In order to account for these  
112 confounding factors and to identify DMRs that reflect evolutionary differences between human  
113 groups, we took a series of steps. To minimize false positives that could arise from the comparison  
114 of maps produced using various technologies, we set the reconstructed Ust'-Ishim methylome as  
115 the MH reference, to which we compared the Altai Neanderthal and the Denisovan. We developed  
116 a DMR-detection method for ancient methylomes, which accounts for potential noise introduced  
117 during reconstruction, as well as differences in coverage and deamination rates (Figure 1 and  
118 Methods). To minimize the number of false positives and to identify DMRs that are most likely to  
119 have a regulatory effect, we applied a strict threshold of >50% difference in methylation across a  
120 minimum of 50 CpGs. This also filters out environmentally-induced DMRs which typically show  
121 low methylation differences and limited spatial scope (Gokhman et al., 2017b). Using this method,  
122 we identified 9,679 regions that showed methylation differences between these individuals. These  
123 regions do not necessarily represent evolutionary differences between the human groups. Rather,  
124 many of them could be attributed to factors separating the three individuals (e.g., Ust'-Ishim is a

125 male whereas the archaic humans are females), or to variability within populations. To minimize  
126 such effects, we used the 59 additional human maps to filter out regions where variability in  
127 methylation is detected. We adopted a conservative approach, whereby we take only loci where  
128 methylation in one hominin group is found completely outside the range of methylation in the  
129 other groups. Importantly, our samples come from both sexes, from individuals of various ages  
130 and ancestries, from sick and healthy individuals, and from a variety of skeletal parts (femur, skull,  
131 phalanx, tooth, and rib; Table S1). Hence, the use of these samples to filter out DMRs is expected  
132 to cover much of the variation that stems from the above factors (Figure 1, Figure 2A-C). This step  
133 resulted in a set of 7,649 DMRs that discriminate between the human groups, which we ranked  
134 according to their significance level.

135 Next, using the chimpanzee samples, we were able to determine for 2,825 of these DMRs the  
136 lineage where the methylation change occurred (Figures 2D and 3A). Of these DMRs 873 are MH-  
137 derived, 939 are archaic-derived, 443 are Denisovan-derived, and 570 are Neanderthal-derived  
138 (Figure 3A, Table S2). The extensive set of MH maps used to filter out within-population  
139 variability led us to focus in this work on MH-derived DMRs.

#### 140 **Face and voice-affecting genes are derived in MHs**

141 We defined differentially methylated genes (DMGs) as genes that overlap at least one DMR along  
142 their body or up to a distance of 5 kb upstream. The 873 MH-derived DMRs are linked to 588  
143 MH-derived DMGs (Table S2). To gain insight into the function of these DMGs, we first analyzed  
144 their gene ontology (GO). As expected from a comparison between skeletal tissues, MH-derived  
145 DMGs are enriched with terms associated with the skeleton (e.g., *endochondral bone*  
146 *morphogenesis*, *trabecula morphogenesis*, *palate development*, *regulation of cartilage*

147 *development, chondrocyte differentiation and bone morphogenesis*). Also notable are terms  
148 associated with the skeletal muscle, cardiovascular, and nervous system (Table S3).

149 To acquire a more precise understanding of the possible functional consequences of these DMGs,  
150 we used Gene ORGANizer, which links human genes to the organs they phenotypically affect  
151 (Gokhman et al., 2017a). Unlike tools that use GO terms or RNA expression data, Gene  
152 ORGANizer is based entirely on curated gene-disease and gene-phenotype associations from  
153 monogenic diseases. Therefore, it relies on direct phenotypic observations in human patients  
154 whose condition results from known gene perturbations. Using Gene ORGANizer we found 11  
155 organs that are over-represented within the 588 MH-derived DMGs, eight of which are skeletal  
156 parts that can be divided into three regions: the voice box (larynx), face, and pelvis (Figure 3B,  
157 Table S4). The strongest enrichment was observed in the laryngeal region (x2.11 and x1.68, FDR  
158 = 0.017 and 0.048, for the vocal cords and larynx, respectively), followed by facial and pelvic  
159 structures, including the teeth, forehead, jaws, and pelvis. Interestingly, the face and pelvis are  
160 considered the most morphologically divergent regions between Neanderthals and MHs (Weaver,  
161 2009) and our results reflect this divergence through gene regulation changes. The enrichment of  
162 the vocal tract (the pharyngeal, oral, and nasal cavities, where sound is filtered to specific  
163 frequencies) (Fitch, 2000; Lieberman, 2007) is also apparent when examining patterns of gene  
164 expression. This analysis shows that the pharynx and larynx are the most enriched organs within  
165 MH-derived DMGs (1.7x and 1.6x, FDR =  $5.6 \times 10^{-6}$  and FDR =  $7.3 \times 10^{-7}$ , respectively, Table  
166 S3). We also found that 29 of the MH-derived DMRs overlap previously reported craniofacial  
167 development enhancers (4.97-fold compared to expected,  $P < 10^{-6}$ , randomization test) (Prescott  
168 et al., 2015).



169 To test whether this enrichment remains if we take only the most confident DMRs, we limited the  
170 analysis only to DMGs where the most significant DMRs are found (top quartile). Here, the over-  
171 representation of voice-affecting genes is more pronounced, with the vocal cords enriched almost  
172 3-fold (FDR = 0.028), and the larynx over 2-fold (FDR = 0.028, Figure 3C, Table S4).

173 Next, we hypothesized that skeletal-associated genes are likely to be enriched when comparing  
174 DNA methylation maps originating from bones, hence introducing potential biases. To test  
175 whether the over-representation of the larynx, face, and pelvis is a consequence of this, we  
176 compared the fraction of genes affecting the face, larynx, and pelvis among all skeletal genes to  
177 their fraction within the skeletal genes in the MH-derived DMGs. We found that genes affecting  
178 the face, larynx, and pelvis are significantly over-represented within skeletal MH-derived DMGs  
179 ( $P = 1.0 \times 10^{-5}$ ,  $P = 1.3 \times 10^{-3}$ ,  $P = 2.1 \times 10^{-3}$ ,  $P = 0.03$ , for vocal cords, larynx, face, and pelvis,  
180 respectively, hypergeometric test). Additionally, we conducted a permutation test on the list of 129  
181 MH-derived DMGs that are linked to organs on Gene ORGANizer, replacing those that are linked  
182 to the skeleton with randomly selected skeletal-related genes. We then ran the list in Gene  
183 ORGANizer and computed the enrichment. We repeated the process 100,000 times and found that  
184 the enrichment levels we observed within MH-derived DMGs are significantly higher than  
185 expected by chance for the laryngeal and facial regions, but not for the pelvis ( $P = 8.6 \times 10^{-6}$ ,  $P =$   
186  $6.6 \times 10^{-4}$ ,  $P = 4.3 \times 10^{-5}$ , and  $P = 6.5 \times 10^{-3}$ , for vocal cords, larynx, face and pelvis, respectively,  
187 Figure S1A). Thus, the fact that the DMGs were detected in a comparison of bone methylomes is  
188 unlikely to underlie the observed enrichment of the larynx, vocal cords, and face, but it could  
189 potentially drive the enrichment of genes related to the pelvis. We therefore focus hereinafter on  
190 genes affecting the facial and laryngeal regions.

191 We next analyzed whether pleiotropy could underlie the observed enrichments. To some extent,  
192 Gene ORGANizer negates pleiotropic effects (Gokhman et al., 2017a). Despite the fact that the  
193 DMGs belong to different pathways, and some have pleiotropic functions (Gokhman et al., 2017a;  
194 Kanehisa et al., 2016; Köhler et al., 2014), their most significantly shared properties are still in  
195 shaping the vocal and facial anatomy. Nevertheless, we tested this possibility more directly,  
196 estimating the pleiotropy of each gene by counting the number of different Human Phenotype  
197 Ontology (HPO) terms that are associated with it across the entire body (Köhler et al., 2014). We  
198 found that DMGs do not tend to be more pleiotropic than the rest of the genome ( $P = 0.17$ ,  $t$ -test),  
199 nor do voice- and face-affecting DMGs tend to be more pleiotropic than other DMGs ( $P = 0.19$   
200 and  $P = 0.27$ , respectively).

201 Potentially, longer genes have higher probability to overlap DMRs. To test whether variability in  
202 gene length might have contributed to the patterns we report, we took only DMGs with DMRs in  
203 their promoter region (-5 kb to +1 kb around the TSS). We observe very similar levels of  
204 enrichment (2.02x, 1.67x, and 1.24x, for vocal cords, larynx, and face, respectively, albeit FDR  
205 values  $> 0.05$  due to low statistical power), suggesting that gene length does not affect the observed  
206 enrichment in genes affecting the face and larynx.

207 Additionally, to test whether cellular composition or differentiation state could bias the results, we  
208 ran Gene ORGANizer on the list of DMGs, following the removal of 20 DMRs that are found  $< 10$   
209 kb from loci where methylation was shown to change during osteogenic differentiation (Håkelién  
210 et al., 2014). We found that genes affecting the voice and face are still the most over-represented  
211 (2.13x, 1.71x, and 1.27x, FDR = 0.032, FDR = 0.049, and FDR = 0.040, for vocal cords, larynx,  
212 and face, respectively, Table S4).

213 We also investigated the possibility that (for an unknown reason) the DMR-detection algorithm  
214 introduces positional biases that preferentially identify DMRs within genes affecting the voice or  
215 face. To this end, we simulated stochastic deamination processes along the Ust'-Ishim, Altai  
216 Neanderthal, and Denisovan genomes, reconstructed methylation maps, and ran the DMR-  
217 detection algorithm on these maps. We repeated this process 100 times for each hominin and found  
218 no enrichment of any body part, including the face, vocal cords, or larynx (1.07x, 1.07x, and 1.04x,  
219 respectively, FDR = 0.88 for vocal cords, larynx, and face). Perhaps most importantly, none of the  
220 other archaic branches shows enrichment of the larynx or the vocal cords. However, archaic-  
221 derived DMGs show over-representation of the jaws, as well as the lips, limbs, scapulae, and spinal  
222 column (Figure S1B, Table S4). In addition, DMRs that separate chimpanzees from all humans  
223 (archaic and modern, Table S2) do not show over-representation of genes that affect the voice,  
224 larynx, or face, compatible with the notion that this trend emerged along the MH lineage. Lastly,  
225 we added a human bone reduced representation bisulfite sequencing (RRBS) map (Wang et al.,  
226 2012), and produced a RRBS map from a chimpanzee infant unspecified long bone (Table S1, see  
227 Methods). RRBS methylation maps include information on only ~10% of CpG sites, and are biased  
228 towards unmethylated sites. Therefore, they were not included in the previous analyses. However,  
229 we added them in this part as they originate from a chimpanzee infant and a present-day human  
230 that is of similar age to the Denisovan (Table S1), allowing sampling from individuals that are  
231 younger than the rest. Repeating the Gene ORGANizer analysis after including these samples in  
232 the filtering process, we found that the face and larynx are the only significantly enriched skeletal  
233 regions, and the enrichment within voice-affecting genes becomes even more pronounced (2.33x,  
234 FDR =  $7.9 \times 10^{-3}$ , Table S4). Overall, we observe that MH-derived DMGs across all 60 MH  
235 samples are found outside archaic human variability, regardless of bone type, disease state, age, or

236 sex, and that chimpanzee methylation levels in these DMGs cluster closer to archaic humans than  
237 to MHs, suggesting that these factors are unlikely to underlie the observed trends.

238 Taken together, we conclude that DMGs that emerged along the MH lineage are uniquely enriched  
239 in genes affecting the voice and face, and that this is unlikely to be an artifact of (a) inter-individual  
240 variability resulting from age, sex, disease, or bone type; (b) significance level of DMRs; (c) the  
241 reconstruction or DMR-detection processes; (d) pleiotropic effects of the genes; (e) the types of  
242 maps used in these processes; (f) the comparison of bone methylomes; or (g) gene length  
243 distribution.

244 Overall, we report 32 voice- and larynx-affecting DMGs. Disease-causing mutations in these genes  
245 have been shown to underlie various phenotypes, ranging from slight changes to the pitch and  
246 hoarseness of the voice, to a complete loss of speech ability (Table 1) (Gokhman et al., 2017a).  
247 These phenotypes were shown to be driven primarily by alterations to the laryngeal skeleton and  
248 vocal tract. Importantly, the laryngeal skeleton, and particularly the cricoid and arytenoid  
249 cartilages to which the vocal cords are anchored, are closest developmentally to limb bones, as  
250 these are the skeletal tissues that derive from the somatic layer of the lateral plate mesoderm.  
251 Methylation patterns in differentiated cells are often established during earlier stages of  
252 development, and the closer two tissues are developmentally, the higher the similarity between  
253 their methylation maps (Hernando-Herraez et al., 2015a, 2015b; Hon et al., 2013; Schultz et al.,  
254 2015; Ziller et al., 2013). Indeed, DMRs identified between species in one tissue often exist in  
255 other tissues as well (Hernando-Herraez et al., 2015b). Thus, it is likely that many of the DMRs  
256 identified here between limb samples also exist between laryngeal tissues. This is further supported  
257 by the observation that the methylation patterns in these DMGs appear in all examined skeletal  
258 samples, including femur, skull, rib, tibia, and tooth.

## 259 Extensive methylation changes within face and voice-affecting genes

260 Our results suggest that methylation levels in many face- and voice-affecting genes have changed  
261 since the split from archaic humans, but they do not provide information on the extent of changes  
262 within each gene. To do so, we scanned the genome in windows of 100 kb and computed the  
263 fraction of CpGs which are differentially methylated in MHs (hereinafter, MH-derived CpGs). We  
264 found that the extent of changes within voice-affecting DMGs is most profound, more than 2-fold  
265 compared to other DMGs (0.132 vs. 0.055,  $FDR = 2.3 \times 10^{-3}$ , *t*-test, Table S5). Face-affecting  
266 DMGs also present high density of MH-derived CpGs (0.079 vs. 0.055,  $FDR = 2.8 \times 10^{-3}$ ). In  
267 archaic-derived DMGs, on the other hand, the extent of changes within voice- and face-affecting  
268 genes is not different than expected ( $FDR = 0.99$ , Table S5). To control for possible biases, we  
269 repeated the analysis using only the subset of DMRs in genes affecting the skeleton. Here too, we  
270 found that voice-affecting MH-derived DMGs present the highest density of changes (+154% for  
271 vocal cords, +140% for larynx,  $FDR = 1.4 \times 10^{-3}$ , Table S5), and face-affecting DMGs also exhibit  
272 significantly elevated density of changes (+42% for face,  $FDR = 0.04$ ).

273 Interestingly, when ranking DMGs according to the fraction of MH-derived CpGs, three of the top  
274 five, and all top five skeleton-related DMGs (*ACAN*, *SOX9*, *COL2A1*, *XYLT1*, and *NFIX*) affect  
275 lower and midfacial protrusion, as well as the voice (Frenzel et al., 1998; Lee and Saint-Jeannet,  
276 2011; Meyer et al., 1997; Tompson et al., 2009) (Figure 4A,B). This is particularly surprising  
277 considering that genome-wide, less than 2% of genes (345) are known to affect the voice, ~3% of  
278 genes (726) are known to affect lower and midfacial protrusion, and less than 1% (182) are known  
279 to affect both. We also found that DMRs in voice- and face-affecting genes tend to be located ~20x  
280 closer than expected to MH-specific candidate positively selected loci (Peyrégne et al., 2017) ( $P$   
281  $< 10^{-5}$ , permutation test), and 50% closer compared to other MH-derived DMRs ( $P < 10^{-5}$ , Figure

282 4C). This is consistent with the possibility that some of these observations could have been driven  
283 by positive selection.

284 The extra-cellular matrix genes *ACAN* and *COL2A1*, and their key regulator *SOX9*, form a network  
285 of genes that regulate skeletal growth, the transition from cartilage to bone, and spatio-temporal  
286 patterning of skeletal development, including facial and laryngeal skeleton in human (Lee and  
287 Saint-Jeannet, 2011; Meyer et al., 1997) and mouse (Ng et al., 1997). *SOX9* is regulated by a  
288 series of upstream enhancers identified in mouse and human (Bagheri-Fam et al., 2006; Sekido  
289 and Lovell-Badge, 2008; Yao et al., 2015). In human skeletal samples, hypermethylation of the  
290 *SOX9* promoter was shown to down-regulate its activity, and consequently its targets (Kim et al.,  
291 2013). This was also demonstrated repeatedly in non-skeletal human (Aleman et al., 2008; Cheng  
292 et al., 2015; Wagner et al., 2014) and mouse tissues (Huang et al., 2017; Pamnani et al., 2016). We  
293 found substantial hypermethylation in MHs in the following regions: (a) the *SOX9* promoter; (b)  
294 three of its proximal enhancers, including one that is active in mesenchymal cells (Yao et al.,  
295 2015); (c) four of its skeletal enhancers; (d) the targets of *SOX9* – *ACAN* (DMR #80) and *COL2A1*  
296 (DMR #1, the most significant MH-derived DMR); and (e) an upstream lincRNA (*LINC02097*).  
297 Notably, regions (a), (b), (c), and (e) are covered by the longest DMR on the MH-derived DMR  
298 list, spanning 35,910 bp (DMR #11, Figure 5). Additionally, a more distant putative enhancer,  
299 located 345kb upstream of *SOX9*, was shown to bear strong active histone modification marks in  
300 chimpanzee craniofacial progenitor cells, whereas in humans these marks are almost absent (~10x  
301 stronger in chimpanzee, suggesting down-regulation, Figure 5B) (Prescott et al., 2015).  
302 Importantly, human and chimpanzee non-skeletal tissues (i.e., brain and blood) exhibit very similar  
303 methylation patterns in these genes, suggesting they are bone-specific. Also, the amino acid  
304 sequence coded by each of these genes is identical across the hominin groups (Prüfer et al., 2014),

305 suggesting that the changes along the MH lineage are purely regulatory. Together, these  
306 observations put forward the notion that *SOX9* became down-regulated in MH skeletal tissues,  
307 likely followed by down-regulation of its targets, *ACAN* and *COL2A1*.

308 *XYLT1*, the 4<sup>th</sup> highest skeleton-related DMG, is an enzyme involved in the synthesis  
309 of glycosaminoglycan. Loss-of-function mutations and reduced expression of the gene were  
310 shown to underlie the Desbuquois dysplasia skeletal syndrome, which was observed to affect the  
311 cartilaginous structure of the larynx, and drive a retraction of the face (Hall, 2001). Very little is  
312 known about *XYLT1* regulation, but interestingly, in zebrafish it was shown to be bound by SOX9  
313 (Ohba et al., 2015).

#### 314 ***NFIX* methylation is inversely correlated with its expression**

315 To further explore expression changes that are associated with changes in methylation, we scanned  
316 the DMRs to identify those whose methylation levels are strongly correlated with expression  
317 across 21 human tissues. We found 59 such MH-derived DMRs (FDR < 0.05). DMRs in voice-  
318 affecting genes are significantly more likely to be associated with expression compared to other  
319 DMRs (x2.05,  $P = 6.65 \times 10^{-4}$ , hypergeometric test). Particularly noteworthy is *NFIX*, one of the  
320 most derived genes in MHs (ranked 5<sup>th</sup> among DMGs affecting the skeleton, Figure 4A,B). *NFIX*  
321 has two DMRs (#24 and #167), and in both, methylation levels are tightly linked with expression,  
322 explaining 81.7% and 73.9% of its expression variation, respectively (FDR =  $6.2 \times 10^{-3}$  and  $7.5 \times 10^{-4}$ ,  
323 Figure 6A-C). In fact, *NFIX* is one of the top ten DMGs with the most significant correlation  
324 between methylation and expression in human. The association between *NFIX* methylation and  
325 expression was also shown previously across several mouse tissues (Carrió et al., 2015; Maunakea  
326 et al., 2010), and suggests that the observed hypermethylation reflects down-regulation that

327 emerged along the MH lineage. Indeed, we found that *NFIX*, as well as *SOX9*, *ACAN*, *COL2A1*,  
328 and *XYLTI* show significantly reduced expression levels in humans compared to mice (Figure 6D).  
329 Most of the disease phenotypes that result from *NFIX* dysfunction are in the craniofacial region,  
330 as *NFIX* influences the balance between lower and upper projection of the face (Malan et al., 2010).  
331 In addition, mutations in *NFIX* were shown to impair speech capabilities (Shaw et al., 2010). Taken  
332 together, these observations suggest that DNA methylation is a primary mechanism in the  
333 regulation of *NFIX*, and serves as a good proxy for its expression. Interestingly, NFI proteins were  
334 shown to bind the upstream enhancers of *SOX9* (Pjanic et al., 2013), hence suggesting a possible  
335 mechanism to the simultaneous changes in these genes.

## 336 Discussion

337 Humans are distinguished from other apes in their unique capability to communicate through  
338 speech. This capacity is attributed not only to neural changes, but also to structural alterations to  
339 the vocal tract. The relative roles of anatomy and cognition in our speech skills are still debated,  
340 but it is nevertheless widely accepted that even with a human brain, other apes could not reach the  
341 human level of articulation (Fitch, 2000; Fitch et al., 2017; Lieberman, 2007, 2017). Nonhuman  
342 apes are restricted not only in their linguistic capacity (e.g., they can hardly learn grammar (Fitch,  
343 2000)), but also in their ability to produce the phonetic range that humans can. Indeed,  
344 chimpanzees and bonobos communicate through sign language and symbols much better than they  
345 do vocally, even after being raised in an entirely human environment (Fitch, 2000). Phonetic range  
346 is determined by the different conformations that the vocal tract can produce. These conformations  
347 are largely shaped by the relative position of the larynx, tongue, lips, and mandible. Modern  
348 humans have a 1:1 proportion between the horizontal and vertical dimensions of the vocal tract,



349 which is unique among primates (Figure 6E) (Lieberman, 2007; Lieberman et al., 2001). It is still  
350 debated whether this configuration is a prerequisite for speech, but it was nonetheless shown to be  
351 optimal for speech (De Boer, 2010; Fitch, 2000; Lieberman, 2007; Lieberman et al., 2001). The  
352 1:1 proportion was reached through retraction of the human face, together with the descent of the  
353 larynx (Lieberman, 2011).

354 A longstanding question is whether Neanderthals and modern humans share similar vocal anatomy  
355 (Boë et al., 2002; Fitch, 2000; Lieberman P. and McCarthy C., 2014; Steele et al., 2013). Attempts  
356 to answer this question based on morphological differences between the two human groups have  
357 proven hard, as the larynx is mostly composed of soft tissues (e.g., cartilage), which do not survive  
358 long after death. The only remnant from the Neanderthal laryngeal region is the hyoid bone (Fitch,  
359 2000; Steele et al., 2013). Based on this single bone, or on computer simulations and tentative  
360 vocal tract reconstructions, it is difficult to characterize the full anatomy of the Neanderthal vocal  
361 apparatus, and opinions remain split as to whether it was similar to modern humans (Boë et al.,  
362 2002; Fitch, 2000; Lieberman P. and McCarthy C., 2014; Steele et al., 2013).

363 The results we report, which are based on reconstructions of ancient DNA methylation patterns,  
364 provide a novel means to analyze the mechanisms that underlie the evolution of the human face  
365 and vocal tract. We have shown here that genes affecting vocal and facial anatomy went through  
366 extensive methylation changes in recent MH evolution, following the split from Neanderthals and  
367 Denisovans. These alterations are manifested both in the number of divergent genes and in the  
368 extent of changes within each gene. The DMRs we report capture substantial methylation changes  
369 (over 50% between at least one pair of human groups), span thousands or tens of thousands of  
370 bases, and cover regulatory regions such as promoters and enhancers. Many of these methylation  
371 changes were shown here and in previous works to be tightly linked with changes in expression

372 levels. We particularly focused on changes in the regulation of the five most diverged genes on  
373 the MH lineage: *SOX9*, *ACAN*, *COL2A1*, *XYLT1*, and *NFIX*, which are all associated with a range  
374 of skeletal phenotypes, and whose downregulation was shown to underlie a retracted face, as well  
375 as changes to the structure of the larynx.

376 In this paper, we argue for possible interplay between methylation changes and phenotypic effects.  
377 Such links are not straightforward, because almost all studies linking genes to diseases and  
378 phenotypes seek sequence mutations, and particularly those that affect protein sequence.  
379 Nevertheless, many diseases-causing genetic variants are loss-of-function mutations, especially  
380 those that cause haploinsufficiency, and their effect could be roughly paralleled to partial silencing  
381 of a gene. Therefore, phenotypes associated with such loss-of-function genetic variants could be  
382 regarded as consequences of reduced gene activity in humans. To support our inference on the  
383 facial and laryngeal phenotypic impacts of methylation changes in *SOX9*, *ACAN*, *COL2A1*,  
384 *XYLT1*, and *NFIX* we verified that these phenotypes are indeed a result of loss-of-function  
385 mutations.

386 *NFIX* poses a particularly interesting example, as the methylation levels in its two DMRs strongly  
387 predict its expression level (Figure 6B,C). To investigate whether changes in *NFIX* expression  
388 could explain some specific morphological changes in MH face and larynx, we examined its  
389 skeletal phenotypes. Mutations in *NFIX* were shown to be behind the Marshall-Smith and Malan  
390 syndromes, whose phenotypes include various skeletal alterations such as hypoplasia of the  
391 midface, retracted lower jaw, and depressed nasal bridge (Malan et al., 2010), as well as limited  
392 speech capabilities (Shaw et al., 2010). In many of the patients, the phenotypic alterations are  
393 driven by heterozygous loss-of-function mutations causing haploinsufficiency, showing that  
394 changes in *NFIX* dosage affect skeletal morphology (Malan et al., 2010). Given that reduced

395 activity of *NFIX* drives these symptoms, a possible hypothesis is that increased *NFIX* activity in  
396 the Neanderthal would result in phenotypic changes in the opposite direction. Such opposite  
397 phenotypic effects of under- and over-expression of genes has been demonstrated previously in  
398 hundreds of genes, and especially within transcription factors (Dang et al., 2008; Hamosh et al.,  
399 2005; Strande et al., 2017). Indeed, we found this to be the case in 18 out of 22 Marshall-Smith  
400 syndrome skeletal phenotypes, and in 8 out of 9 Malan syndrome skeletal phenotypes. In other  
401 words, from the syndromes driven by *NFIX* haploinsufficiency, through healthy MHs, to the  
402 Neanderthal, the level of phenotype manifestation corresponds to the level of *NFIX* activity (Figure  
403 6F, Table S6). Interestingly, many cases of laryngeal malformations in the Marshall-Smith  
404 syndrome have been reported (Cullen et al., 1997). Some of the patients exhibit positional changes  
405 of the larynx, changes in its width, and structural alterations to the arytenoid cartilage – the anchor  
406 point of the vocal cords, which controls their movement (Cullen et al., 1997). In fact, these  
407 laryngeal and facial anatomical changes are thought to underlie the limited speech capabilities  
408 observed in some patients (Shaw et al., 2010).

409 In light of the role of facial flattening in determining speech capabilities, it is illuminating that  
410 flattening of the face is the most common phenotype associated with reduced activity of *SOX9*,  
411 *ACAN*, and *COL2A1* (Gokhman et al., 2017a). Heterozygous loss-of-function mutations in *SOX9*,  
412 which result in a reduction of ~50% in its activity, were shown to cause a retracted lower face, and  
413 to affect the pitch of the voice (Lee and Saint-Jeannet, 2011; Meyer et al., 1997). *ACAN* was shown  
414 to affect facial prognathism and the hoarseness of the voice (Tompson et al., 2009). *COL2A1* is  
415 key for proper laryngeal skeletal development (Frenzel et al., 1998), and its decreased activity  
416 results in a retracted face (Hoornaert et al., 2010). The lower and midface of MHs is markedly  
417 retracted not only compared to apes, but also to Australopithecines and other *Homo* groups,

418 including the Neanderthal (Lieberman, 2011). The developmental alterations that underlie the  
419 ontogeny of the human face, however, are still under investigation. Cranial base length and flexion  
420 were shown to play a role in the retracted face, as well as in vocal tract length (Aiello and Dean,  
421 2002; Lieberman, 1998, 2011), but reduced growth rate and heterochrony of spatio-temporal  
422 switches are thought to be involved as well (Bastir et al., 2007). Importantly, *SOX9* and *COL2A1*  
423 were implicated in the elongation and ossification of the cranial base (Horton WA, Rimo DL,  
424 Hollister DW, 1979; Yan et al., 2005), and the methylation patterns we report all exist in the cranial  
425 base sample (I1583). Additionally, *SOX9* is a key regulator of skeletal growth rate, and the  
426 developmental switch to ossification (Lee and Saint-Jeannet, 2011; Meyer et al., 1997).  
427 Importantly, facial retraction also occurred before the split of archaic and modern humans, and the  
428 faces of hominins are substantially shorter than those of chimpanzees and bonobos (Lieberman,  
429 2011). Therefore, the DMGs we report could potentially be associated with recent facial retraction  
430 in MHs, but not with morphological changes that precede the split.

431 We identified DMRs in *SOX9*, *ACAN*, *COL2A1*, *XYLT1*, and *NFIX* as some of the most derived  
432 loci in MHs. These genes are active mainly in early stages of osteochondrogenesis, making the  
433 observation of differential methylation in mature bones puzzling at first glance. This could  
434 potentially be explained by two factors: (i) The DMRs might reflect early methylation changes in  
435 the mesenchymal progenitors of these cells that are carried on to later stages of osteogenesis. This  
436 possibility is supported by previous observations of many regulatory regions that are active during  
437 early development and maintain their active methylation marks in adult tissues, despite becoming  
438 inactive. In such regions, adult methylation states reflect earlier development, and DMRs in adult  
439 stages could reflect heterochrony or earlier alterations in activity levels (Hernando-Herraez et al.,  
440 2015a; Hon et al., 2013; Schultz et al., 2015). It is also supported by the observation that the

441 methylation patterns of *NFIX*, *SOX9*, *ACAN*, and *COL2A1* are established in early stages of  
442 development and remain stable throughout differentiation from mesenchymal stem cells to  
443 osteocytes (Håkelién et al., 2014). Additionally, we show that the upstream mesenchymal enhancer  
444 of *SOX9* (Yao et al., 2015) is differentially methylated in MHs (Figure 5B). (ii) Although  
445 expression levels of *SOX9*, *ACAN*, and *COL2A1* gradually decrease with the progress towards  
446 skeletal maturation, these genes were shown to be still expressed in later skeletal developmental  
447 stages in the larynx, vertebrae, limbs, and jaws, including in their osteoblasts (Moriarity et al.,  
448 2015; Ng et al., 1997; Rojas-Peña et al., 2014). Interestingly, these are also the organs that are  
449 most affected by mutations in these genes, implying that late stages of activity of these genes might  
450 still play important roles in morphological patterning (Frenzel et al., 1998; Hoornaert et al., 2010;  
451 Lee and Saint-Jeannet, 2011; Meyer et al., 1997; Tompson et al., 2009). It was also shown that  
452 facial growth patterns, which shape facial prognathism, differ between archaic and modern humans  
453 not only during early development, but also as late as adolescence (Lacruz et al., 2015).

454 To further investigate potential phenotypic consequences of the DMGs we report, we probed the  
455 HPO database (Köhler et al., 2014). For each skeletal-affecting phenotype, we determined whether  
456 it matches a known morphological difference between Neanderthals and MHs. For example,  
457 *FGFR3* was shown to affect the size of the iliac bones (HPO ID: HP:0000946), and in the  
458 Neanderthal, these bones are considerably hyperplastic compared to MHs (Weaver, 2009). We  
459 then counted for each gene (whether DMG or not) the fraction of its associated HPO phenotypes  
460 that are divergent between Neanderthals and MHs. We found that four out of the top five most  
461 differentially methylated genes (*XYLT1*, *NFIX*, *ACAN*, and *COL2A1*) are found within the top 100  
462 genes with the highest fraction of traits where Neanderthals and MHs differ (out of a total of 1,789  
463 skeleton-related genes). In fact, *COL2A1*, which is the most differentially methylated gene, is also

464 the gene associated with the most derived traits (63) compared to all genes throughout the genome  
465 (Table S7).

466 DNA methylation in some loci differs between cell types and sexes, changes with age, and might  
467 be affected by factors such as environment and diet (Gokhman et al., 2017b). In this work, we took  
468 measures to exclude such DMRs and to focus on DMRs that likely represent evolutionary  
469 differences between the human groups. This was done by combining information from diverse  
470 methylation maps. In MH-derived DMRs, for example, we use only DMRs in which chimpanzees  
471 and archaic humans form a cluster that is distinct from the cluster of MHs (Figure 2A). Each of  
472 the two clusters contains samples from females and males, and from a variety of ages and bones  
473 (Table S1). Additionally, we show that these DMRs hold even when comparing methylation maps  
474 produced using the same technology, and from the same bone type, sex, and age group (Figure  
475 S2A,B). Therefore, the observed differences are unlikely to be driven by these factors, but rather  
476 add credence to the notion that they reflect MH-specific evolutionary shifts. This is further  
477 supported by the phenotypic observations that facial prognathism in general, and facial growth  
478 rates in particular, are derived and reduced in MHs (Lacruz et al., 2015).

479 The results we presented here open a window to study the evolution of the MH face and vocal tract  
480 from a genetic perspective. Our data suggest shared genetic mechanisms that shaped these  
481 anatomical regions and point to evolutionary events that separate MHs from the Neanderthal and  
482 Denisovan. The mechanisms leading to such extensive regulatory shifts, as well as if and to what  
483 extent these evolutionary changes affected speech capabilities are still to be determined.

## 484 References

- 485 Aiello, L., and Dean, C. (2002). *An Introduction to Human Evolutionary Anatomy* (London: Elsevier).
- 486 Aleman, A., Adrien, L., Lopez-Serra, L., Cordon-Cardo, C., Esteller, M., Belbin, T.J., and Sanchez-  
487 Carbayo, M. (2008). Identification of DNA hypermethylation of SOX9 in association with bladder cancer  
488 progression using CpG microarrays. *Br. J. Cancer* 98, 466–473.
- 489 Altschul, S.F., Madden, T.L., Schäffer, A.A., Zhang, J., Zhang, Z., Miller, W., and Lipman, D.J. (1997).  
490 Gapped BLAST and PSI-BLAST: a new generation of protein database search programs. *Nucleic Acids*  
491 *Res.* 25, 3389–3402.
- 492 Aryee, M.J., Jaffe, A.E., Corrada-Bravo, H., Ladd-Acosta, C., Feinberg, A.P., Hansen, K.D., and Irizarry,  
493 R.A. (2014). Minfi: a flexible and comprehensive Bioconductor package for the analysis of Infinium DNA  
494 methylation microarrays. *Bioinformatics* 30, 1363–1369.
- 495 Ayturk, U.M., Jacobsen, C.M., Christodoulou, D.C., Gorham, J., Seidman, J.G., Seidman, C.E., Robling,  
496 A.G., and Warman, M.L. (2013). An RNA-seq protocol to identify mRNA expression changes in mouse  
497 diaphyseal bone: Applications in mice with bone property altering Lrp5 mutations. *J. Bone Miner. Res.* 28,  
498 2081–2093.
- 499 Bagheri-Fam, S., Barrionuevo, F., Dohrmann, U., Günther, T., Schüle, R., Kemler, R., Mallo, M., Kanzler,  
500 B., and Scherer, G. (2006). Long-range upstream and downstream enhancers control distinct subsets of the  
501 complex spatiotemporal Sox9 expression pattern. *Dev. Biol.* 291, 382–397.
- 502 Barnett, R., and Larson, G. (2012). A phenol-chloroform protocol for extracting DNA from ancient  
503 samples. *Methods Mol. Biol.* 840, 13–19.
- 504 Bastir, M., O’Higgins, P., and Rosas, A. (2007). Facial ontogeny in Neanderthals and modern humans.  
505 *Proc. R. Soc. B Biol. Sci.* 274, 1125–1132.

- 506 Been, E., Gómez-Olivencia, A., and Kramer, P.A. (2012). Lumbar lordosis of extinct hominins. *Am. J.*  
507 *Phys. Anthropol.* *147*, 64–77.
- 508 Boë, L.-J., Heim, J.-L., Honda, K., and Maeda, S. (2002). The potential Neandertal vowel space was as  
509 large as that of modern humans. *J. Phon.* *30*, 465–484.
- 510 De Boer, B. (2010). Modelling vocal anatomy’s significant effect on speech. *J. Evol. Psychol.* *8*, 351–366.
- 511 Boyle, P., Clement, K., Gu, H., Smith, Z.D., Ziller, M., Fostel, J.L., Holmes, L., Meldrim, J., Kelley, F.,  
512 Gnirke, A., et al. (2012). Gel-free multiplexed reduced representation bisulfite sequencing for large-scale  
513 DNA methylation profiling. *Genome Biol.* *13*, R92.
- 514 Briggs, A.W., Stenzel, U., Meyer, M., Krause, J., Kircher, M., and Pääbo, S. (2010). Removal of  
515 deaminated cytosines and detection of in vivo methylation in ancient DNA. *Nucleic Acids Res.* *38*, e87.
- 516 Carrió, E., Díez-Villanueva, A., Lois, S., Mallona, I., Cases, I., Forn, M., Peinado, M.A., and Suelves, M.  
517 (2015). Deconstruction of DNA methylation patterns during myogenesis reveals specific epigenetic events  
518 in the establishment of the skeletal muscle lineage. *Stem Cells* *33*, 2025–2036.
- 519 Cheng, P.F., Shakhova, O., Widmer, D.S., Eichhoff, O.M., Zingg, D., Frommel, S.C., Belloni, B.,  
520 Raaijmakers, M.I., Goldinger, S.M., Santoro, R., et al. (2015). Methylation-dependent SOX9 expression  
521 mediates invasion in human melanoma cells and is a negative prognostic factor in advanced melanoma.  
522 *Genome Biol.* *16*, 42.
- 523 Clement, A.F., Hillson, S.W., and Aiello, L.C. (2012). Tooth wear, Neanderthal facial morphology and the  
524 anterior dental loading hypothesis. *J. Hum. Evol.* *62*, 367–376.
- 525 Cullen, A., Clarke, T.A., and O’Dwyer, T.P. (1997). The Marshall-Smith syndrome: a review of the  
526 laryngeal complications. *Eur J Pediatr* *156*, 463–464.
- 527 Dabney, J., Knapp, M., Glocke, I., Gansauge, M.-T., Weihmann, A., Nickel, B., Valdiosera, C., García, N.,



- 528 Pääbo, S., Arsuaga, J.-L., et al. (2013). Complete mitochondrial genome sequence of a Middle Pleistocene  
529 cave bear reconstructed from ultrashort DNA fragments. *Proc. Natl. Acad. Sci. U. S. A.* *110*, 15758–15763.
- 530 Dang, V.T., Kassahn, K.S., Marcos, A.E., and Ragan, M.A. (2008). Identification of human  
531 haploinsufficient genes and their genomic proximity to segmental duplications. *Eur. J. Hum. Genet.* *16111*,  
532 1350–1357.
- 533 Fitch, W.T. (2000). The evolution of speech: A comparative review. *Trends Cogn. Sci.* *4*, 258–267.
- 534 Fitch, W.T., de Boer, B., Mathur, N., and A. Ghazanfar, A. (2017). Response to Lieberman on “Monkey  
535 vocal tracts are speech-ready.” *Sci. Adv.* *3*.
- 536 Fortin, J.-P., Labbe, A., Lemire, M., Zanke, B.W., Hudson, T.J., Fertig, E.J., Greenwood, C.M., and  
537 Hansen, K.D. (2014). Functional normalization of 450k methylation array data improves replication in large  
538 cancer studies. *Genome Biol.* *15*, 503.
- 539 Fortin, J.-P., Triche, T., and Hansen, K. (2016). Preprocessing, normalization and integration of the Illumina  
540 HumanMethylationEPIC array. *bioRxiv* 65490.
- 541 Fraser, H.B. (2013). Gene expression drives local adaptation in humans. *Genome Res.* *23*, 1089–1096.
- 542 Frenzel, K., Amann, G., and Lubec, B. (1998). Deficiency of laryngeal collagen type II in an infant with  
543 respiratory problems. *Arch. Dis. Child.* *78*, 557–559.
- 544 Fu, Q., Li, H., Moorjani, P., Jay, F., Slepchenko, S.M., Bondarev, A.A., Johnson, P.L.F., Aximu-Petri, A.,  
545 Prüfer, K., de Filippo, C., et al. (2014). Genome sequence of a 45,000-year-old modern human from western  
546 Siberia. *Nature* *514*, 445–449.
- 547 Gokhman, D., Lavi, E., Prüfer, K., Fraga, M.F., Riancho, J.A., Kelso, J., Pääbo, S., Meshorer, E., and  
548 Carmel, L. (2014). Reconstructing the DNA methylation maps of the Neandertal and the Denisovan.  
549 *Science* *344*, 523–527.

- 550 Gokhman, D., Meshorer, E., and Carmel, L. (2016). Epigenetics: It's Getting Old. Past Meets Future in  
551 Paleoepigenetics. *Trends Ecol. Evol.* *31*.
- 552 Gokhman, D., Kelman, G., Amartely, A., Gershon, G., Tsur, S., and Carmel, L. (2017a). Gene ORGANizer:  
553 Linking genes to the organs they affect. *Nucleic Acids Res.* *45*.
- 554 Gokhman, D., Malul, A., and Carmel, L. (2017b). Inferring Past Environments from Ancient Epigenomes.  
555 *Mol. Biol. Evol.* *msx211*.
- 556 Gómez-Olivencia, A., Been, E., Arsuaga, J.L., and Stock, J.T. (2013). The Neandertal vertebral column 1:  
557 The cervical spine. *J. Hum. Evol.* *64*, 608–630.
- 558 De Groote, I. (2011). The Neanderthal lower arm. *J. Hum. Evol.* *61*, 396–410.
- 559 De Groote, I.E.P.M. (2008). A comprehensive analysis of long bone curvature in Neanderthals and Modern  
560 Humans using 3D morphometrics. University College London.
- 561 Haak, W., Lazaridis, I., Patterson, N., Rohland, N., Mallick, S., Llamas, B., Brandt, G., Nordenfelt, S.,  
562 Harney, E., Stewardson, K., et al. (2015). Massive migration from the steppe was a source for Indo-  
563 European languages in Europe. *Nature* *522*, 207–211.
- 564 Håkelién, A.M., Bryne, J.C., Harstad, K.G., Lorenz, S., Paulsen, J., Sun, J., Mikkelsen, T.S., Myklebost,  
565 O., and Meza-Zepeda, L.A. (2014). The regulatory landscape of osteogenic differentiation. *Stem Cells* *32*,  
566 2780–2793.
- 567 Hall, B.D. (2001). Lethality in Desbuquois dysplasia: Three new cases. *Pediatr. Radiol.* *31*, 43–47.
- 568 Hamosh, A., Scott, A.F., Amberger, J.S., Bocchini, C.A., and McKusick, V.A. (2005). Online Mendelian  
569 Inheritance in Man (OMIM), a knowledgebase of human genes and genetic disorders. *Nucleic Acids Res.*  
570 *33*.
- 571 Hanghøj, K., Seguin-Orlando, A., Schubert, M., Madsen, T., Pedersen, J.S., Willerslev, E., and Orlando, L.

- 572 (2016). Fast, Accurate and Automatic Ancient Nucleosome and Methylation Maps with epiPALEOMIX.  
573 *Mol. Biol. Evol.* 33, 3284–3298.
- 574 Hernando-Herraez, I., Prado-Martinez, J., Garg, P., Fernandez-Callejo, M., Heyn, H., Hvilson, C., Navarro,  
575 A., Esteller, M., Sharp, A.J., and Marques-Bonet, T. (2013). Dynamics of DNA Methylation in Recent  
576 Human and Great Ape Evolution. *PLOS Genet* 9, e1003763.
- 577 Hernando-Herraez, I., Garcia-Perez, R., Sharp, A.J., and Marques-Bonet, T. (2015a). DNA Methylation:  
578 Insights into Human Evolution. *PLoS Genet.* 11.
- 579 Hernando-Herraez, I., Heyn, H., Fernandez-Callejo, M., Vidal, E., Fernandez-Bellon, H., Prado-Martinez,  
580 J., Sharp, A.J., Esteller, M., and Marques-Bonet, T. (2015b). The interplay between DNA methylation and  
581 sequence divergence in recent human evolution. *Nucleic Acids Res* 43, 8204–8214.
- 582 Hon, G.C., Rajagopal, N., Shen, Y., McCleary, D.F., Yue, F., Dang, M.D., and Ren, B. (2013). Epigenetic  
583 memory at embryonic enhancers identified in DNA methylation maps from adult mouse tissues. *Nat. Genet.*  
584 45, 1198–1206.
- 585 Hoornaert, K.P., Vereecke, I., Dewinter, C., Rosenberg, T., Beemer, F.A., Leroy, J.G., Bendix, L., Björck,  
586 E., Bonduelle, M., Boute, O., et al. (2010). Stickler syndrome caused by COL2A1 mutations: genotype–  
587 phenotype correlation in a series of 100 patients. *Eur J Hum Genet.* 18, 872–880.
- 588 Horton WA, Rimoin DL, Hollister DW, L.R. (1979). Further heterogeneity within lethal neonatal short-  
589 limbed dwarfism: the platyspondylic types. *J Pediatr.* 94, 736–742.
- 590 Horvath, S., Mah, V., Lu, A.T., Woo, J.S., Choi, O.W., Jasinska, A.J., Riancho, J.A., Tung, S., Coles, N.S.,  
591 Braun, J., et al. (2015). The cerebellum ages slowly according to the epigenetic clock. *Aging (Albany, NY).*  
592 7, 294–306.
- 593 Huang, C.-Z., Xu, J.-H., Zhong, W., Xia, Z.-S., Wang, S.-Y., Cheng, D., Li, J.-Y., Wu, T.-F., Chen, Q.-K.,

- 594 and Yu, T. (2017). Sox9 transcriptionally regulates Wnt signaling in intestinal epithelial stem cells in  
595 hypomethylated crypts in the diabetic state. *Stem Cell Res. Ther.* 8, 60.
- 596 Huang, D.W., Lempicki, R. a, and Sherman, B.T. (2009). Systematic and integrative analysis of large gene  
597 lists using DAVID bioinformatics resources. *Nat. Protoc.* 4, 44–57.
- 598 Huber, W., Carey, V.J., Gentleman, R., Anders, S., Carlson, M., Carvalho, B.S., Bravo, H.C., Davis, S.,  
599 Gatto, L., Girke, T., et al. (2015). Orchestrating high-throughput genomic analysis with Bioconductor. *Nat.*  
600 *Methods* 12, 115–121.
- 601 Kanehisa, M., Sato, Y., Kawashima, M., Furumichi, M., and Tanabe, M. (2016). KEGG as a reference  
602 resource for gene and protein annotation. *Nucleic Acids Res.* 44, D457–D462.
- 603 Kim, K. Il, Park, Y.S., and Im, G. Il (2013). Changes in the epigenetic status of the SOX-9 promoter in  
604 human osteoarthritic cartilage. *J. Bone Miner. Res.* 28, 1050–1060.
- 605 King, M.C., and Wilson, A.C. (1975). Evolution at two levels in humans and chimpanzees. *Science* 188,  
606 107–116.
- 607 Köhler, S., Doelken, S.C., Mungall, C.J., Bauer, S., Firth, H. V., Bailleul-Forestier, I., Black, G.C.M.,  
608 Brown, D.L., Brudno, M., Campbell, J., et al. (2014). The Human Phenotype Ontology project: Linking  
609 molecular biology and disease through phenotype data. *Nucleic Acids Res.* 42.
- 610 Kupczik, K., and Hublin, J.J. (2010). Mandibular molar root morphology in Neanderthals and Late  
611 Pleistocene and recent *Homo sapiens*. *J. Hum. Evol.* 59, 525–541.
- 612 Lacruz, R.S., Bromage, T.G., O’Higgins, P., Arsuaga, J.-L., Stringer, C., Godinho, R.M., Warshaw, J.,  
613 Martínez, I., Gracia-Tellez, A., de Castro, J.M.B., et al. (2015). Ontogeny of the maxilla in Neanderthals  
614 and their ancestors. *Nat. Commun.* 6, 8996.
- 615 Lazaridis, I., Patterson, N., Mittnik, A., Renaud, G., Mallick, S., Sudmant, P.H., Schraiber, J.G., Castellano,

- 616 S., Kirsanow, K., Economou, C., et al. (2014). Ancient human genomes suggest three ancestral populations  
617 for present-day Europeans. *Nature* 513, 409–413.
- 618 Lee, Y.H., and Saint-Jeannet, J.P. (2011). Sox9 function in craniofacial development and disease. *Genesis*  
619 49, 200–208.
- 620 Lieberman, D.E. (1998). Sphenoid shortening and the evolution of modern human cranial shape. *Nature*  
621 393, 158–162.
- 622 Lieberman, D.E. (2011). *The Evolution of the Human Head* (Harvard University Press).
- 623 Lieberman, P. (2007). The Evolution of Human Speech: Its Anatomical and Neural Bases. *Curr. Anthropol.*  
624 48, 39–66.
- 625 Lieberman, P. (2017). Comment on “Monkey vocal tracts are speech-ready.” *Sci. Adv.* 3.
- 626 Lieberman, D.E., Pearson, O.M., and Mowbray, K.M. (2000). Basicranial influence on overall cranial  
627 shape. *J. Hum. Evol.* 38, 291–315.
- 628 Lieberman, D.E., McCarthy, R.C., Hiiemae, K.M., and Palmer, J.B. (2001). Ontogeny of postnatal hyoid  
629 and larynx descent in humans. *Arch. Oral Biol.* 46, 117–128.
- 630 Lieberman P. and McCarthy C. (2014). The Evolution of Speech and Language. *Handb. Paleoanthropology.*
- 631 Lolk, K., Modhukur, V., Rajashekar, B., Märtens, K., Mägi, R., Kolde, R., Koltšina, M., Nilsson, T.K.,  
632 Vilo, J., Salumets, A., et al. (2014). DNA methylome profiling of human tissues identifies global and tissue-  
633 specific methylation patterns. *Genome Biol.* 15, r54.
- 634 Malan, V., Rajan, D., Thomas, S., Shaw, A.C., Louis Dit Picard, H., Layet, V., Till, M., Van Haeringen,  
635 A., Mortier, G., Nampoothiri, S., et al. (2010). Distinct effects of allelic NFIX mutations on nonsense-  
636 mediated mRNA decay engender either a sotos-like or a Marshall-Smith Syndrome. *Am. J. Hum. Genet.*  
637 87, 189–198.

- 638 Martynoga, B., Mateo, J.L., Zhou, B., Andersen, J., Achimastou, A., Urbán, N., van den Berg, D.,  
639 Georgopoulou, D., Hadjur, S., Wittbrodt, J., et al. (2013). Epigenomic enhancer annotation reveals a key  
640 role for NFIX in neural stem cell quiescence. *Genes Dev.* 27, 1769–1786.
- 641 Mathieson, I., Lazaridis, I., Rohland, N., Mallick, S., Patterson, N., Roodenberg, S.A., Harney, E.,  
642 Stewardson, K., Fernandes, D., Novak, M., et al. (2015). Genome-wide patterns of selection in 230 ancient  
643 Eurasians. *Nature* 528, 499–503.
- 644 Maunakea, A.K., Nagarajan, R.P., Bilenky, M., Ballinger, T.J., D’Souza, C., Fouse, S.D., Johnson, B.E.,  
645 Hong, C., Nielsen, C., Zhao, Y., et al. (2010). Conserved role of intragenic DNA methylation in regulating  
646 alternative promoters. *Nature* 466, 253–257.
- 647 Maureille, B., and Bar, D. (1999). The premaxilla in Neandertal and early modern children: ontogeny and  
648 morphology. *J. Hum. Evol.* 37, 137–152.
- 649 McCartney, D.L., Walker, R.M., Morris, S.W., McIntosh, A.M., Porteous, D.J., and Evans, K.L. (2016).  
650 Identification of polymorphic and off-target probe binding sites on the Illumina Infinium MethylationEPIC  
651 BeadChip. *Genomics Data* 9, 22–24.
- 652 Meyer, J., Südbek, P., Held, M., Wagner, T., Schmitz, M.L., Dagna Bricarelli, F., Eggermont, E.,  
653 Friedrich, U., Haas, O.A., Kobelt, A., et al. (1997). Mutational analysis of the SOX9 gene in campomelic  
654 dysplasia and autosomal sex reversal: Lack of genotype/phenotype correlations. *Hum. Mol. Genet.* 6, 91–  
655 98.
- 656 Meyer, M., Kircher, M., Gansauge, M.-T., Li, H., Racimo, F., Mallick, S., Schraiber, J.G., Jay, F., Prüfer,  
657 K., de Filippo, C., et al. (2012). A high-coverage genome sequence from an archaic Denisovan individual.  
658 *Science* 338, 222–226.
- 659 Moriarity, B.S., Otto, G.M., Rahrman, E.P., Rathe, S.K., Wolf, N.K., Weg, M.T., Manlove, L.A., LaRue,  
660 R.S., Temiz, N.A., Molyneux, S.D., et al. (2015). A Sleeping Beauty forward genetic screen identifies new

- 661 genes and pathways driving osteosarcoma development and metastasis. *Nat. Genet.* *47*, 615–624.
- 662 Ng, L.J., Wheatley, S., Muscat, G.E., Conway-Campbell, J., Bowles, J., Wright, E., Bell, D.M., Tam, P.P.,  
663 Cheah, K.S., and Koopman, P. (1997). Sox9 binds DNA, activates transcription, and coexpresses with type  
664 II collagen during chondrogenesis in the mouse. *Dev. Biol.* *183*, 108–121.
- 665 Ohba, S., He, X., Hojo, H., and McMahon, A.P. (2015). Distinct Transcriptional Programs Underlie Sox9  
666 Regulation of the Mammalian Chondrocyte. *Cell Rep.* *12*, 229–243.
- 667 Olalde, I., Allentoft, M.E., Sánchez-Quinto, F., Santpere, G., Chiang, C.W.K., DeGiorgio, M., Prado-  
668 Martinez, J., Rodríguez, J.A., Rasmussen, S., Quilez, J., et al. (2014). Derived immune and ancestral  
669 pigmentation alleles in a 7,000-year-old Mesolithic European. *Nature* *507*, 225–228.
- 670 Ong, M.-L., Tan, P.Y., MacIsaac, J.L., Mah, S.M., Buschdorf, J.P., Cheong, C.Y., Stunkel, W., Chan, L.,  
671 Gluckman, P.D., Chng, K., et al. (2014). Infinium Monkeys: Infinium 450K Array for the Cynomolgus  
672 macaque (*Macaca fascicularis*). *G3 Genes|Genomes|Genetics* *4*, 1227–1234.
- 673 Page, E. (1954). Continuous inspection schemes. *Biometrika* *41*, 100–115.
- 674 Pamnani, M., Sinha, P., Singh, A., Nara, S., and Sachan, M. (2016). Methylation of the Sox9 and Oct4  
675 promoters and its correlation with gene expression during testicular development in the laboratory mouse.  
676 *Genet. Mol. Biol.* *39*, 452–458.
- 677 Pedersen, J.S., Valen, E., Velazquez, A.M.V., Parker, B.J., Rasmussen, M., Lindgreen, S., Lilje, B., Tobin,  
678 D.J., Kelly, T.K., Vang, S., et al. (2014). Genome-wide nucleosome map and cytosine methylation levels  
679 of an ancient human genome. *Genome Res.* *24*, 454–466.
- 680 Peyrégne, S., Boyle, M.J., Dannemann, M., and Prüfer, K. (2017). Detecting ancient positive selection in  
681 humans using extended lineage sorting. *Genome Res.* *27*, 1563–1572.
- 682 Pjanic, M., Schmid, C.D., Gaussin, A., Ambrosini, G., Adamcik, J., Pjanic, P., Plasari, G., Kerschgens, J.,

683 Dietler, G., Bucher, P., et al. (2013). Nuclear Factor I genomic binding associates with chromatin  
684 boundaries. *BMC Genomics* *14*, 99.

685 Prescott, S.L., Srinivasan, R., Marchetto, M.C., Grishina, I., Narvaiza, I., Selleri, L., Gage, F.H., Swigut,  
686 T., and Wysocka, J. (2015). Enhancer Divergence and cis-Regulatory Evolution in the Human and Chimp  
687 Neural Crest. *Cell* *163*, 68–84.

688 Prideaux, M., Dallas, S.L., Zhao, N., Johnsrud, E.D., Veno, P.A., Guo, D., Mishina, Y., Harris, S.E., and  
689 Bonewald, L.F. (2015). Parathyroid hormone induces bone cell motility and loss of mature osteocyte  
690 phenotype through L-calcium channel dependent and independent mechanisms. *PLoS One* *10*.

691 Prüfer, K., Racimo, F., Patterson, N., Jay, F., Sankararaman, S., Sawyer, S., Heinze, A., Renaud, G.,  
692 Sudmant, P.H., de Filippo, C., et al. (2014). The complete genome sequence of a Neanderthal from the Altai  
693 Mountains. *Nature* *505*, 43–49.

694 Raichlen, D.A., Armstrong, H., and Lieberman, D.E. (2011). Calcaneus length determines running  
695 economy: Implications for endurance running performance in modern humans and Neandertals. *J. Hum.*  
696 *Evol.* *60*, 299–308.

697 Reich, D., Green, R.E., Kircher, M., Krause, J., Patterson, N., Durand, E.Y., Viola, B., Briggs, A.W.,  
698 Stenzel, U., Johnson, P.L.F., et al. (2010). Genetic history of an archaic hominin group from Denisova Cave  
699 in Siberia. *Nature* *468*, 1053–1060.

700 Roadmap Epigenomics Consortium, Kundaje, A., Meuleman, W., Ernst, J., Bilenky, M., Yen, A., Heravi-  
701 Moussavi, A., Kheradpour, P., Zhang, Z., Wang, J., et al. (2015). Integrative analysis of 111 reference  
702 human epigenomes. *Nature* *518*, 317–329.

703 Rohland, N., and Hofreiter, M. (2007). Ancient DNA extraction from bones and teeth. *Nat. Protoc.* *2*, 1756–  
704 1762.



705 Rojas-Peña, M.L., Olivares-Navarrete, R., Hyzy, S., Arafat, D., Schwartz, Z., Boyan, B.D., Williams, J.,  
706 and Gibson, G. (2014). Characterization of distinct classes of differential gene expression in osteoblast  
707 cultures from non-syndromic craniosynostosis bone. *J. Genomics* 2, 121–130.

708 Schultz, M.D., He, Y., Whitaker, J.W., Hariharan, M., Mukamel, E.A., Leung, D., Rajagopal, N., Nery,  
709 J.R., Urich, M.A., Chen, H., et al. (2015). Human body epigenome maps reveal noncanonical DNA  
710 methylation variation. *Nature* 523, 212–216.

711 Sekido, R., and Lovell-Badge, R. (2008). Sex determination involves synergistic action of SRY and SF1  
712 on a specific Sox9 enhancer. *Nature* 453, 930–934.

713 Shaw, A.C., Van Balkom, I.D.C., Bauer, M., Cole, T.R.P., Delrue, M.A., Van Haeringen, A., Holmberg,  
714 E., Knight, S.J.L., Mortier, G., Nampoothiri, S., et al. (2010). Phenotype and natural history in Marshall-  
715 Smith syndrome. *Am. J. Med. Genet. Part A* 152, 2714–2726.

716 Siegmund, D.O., Zhang, N.R., and Yakir, B. (2011). False discovery rate for scanning statistics. *Biometrika*  
717 98, 979–985.

718 Simbolo, M., Gottardi, M., Corbo, V., Fassan, M., Mafficini, A., Malpeli, G., Lawlor, R.T., and Scarpa, A.  
719 (2013). DNA Qualification Workflow for Next Generation Sequencing of Histopathological Samples.  
720 *PLoS One* 8.

721 Steele, J., Clegg, M., and Martelli, S. (2013). Comparative morphology of the hominin and african ape  
722 hyoid bone, a possible marker of the evolution of speech. *Hum Biol* 85, 639–672.

723 Strande, N.T., Riggs, E.R., Buchanan, A.H., Ceyhan-Birsoy, O., DiStefano, M., Dwight, S.S., Goldstein,  
724 J., Ghosh, R., Seifert, B.A., Sneddon, T.P., et al. (2017). Evaluating the Clinical Validity of Gene-Disease  
725 Associations: An Evidence-Based Framework Developed by the Clinical Genome Resource. *Am. J. Hum.*  
726 *Genet.* 100, 895–906.

- 727 Tharmaratnam, K., Sperrin, M., Jaki, T., Reppe, S., Frigessi, A., Tibshirani, R., Zhao, P., Yu, B., Zou, H.,  
728 Bunea, F., et al. (2016). Tilting the lasso by knowledge-based post-processing. *BMC Bioinformatics* 17,  
729 344.
- 730 Tompson, S.W., Merriman, B., Funari, V.A., Fresquet, M., Lachman, R.S., Rimoin, D.L., Nelson, S.F.,  
731 Briggs, M.D., Cohn, D.H., and Krakow, D. (2009). A Recessive Skeletal Dysplasia, SEMD Aggrecan Type,  
732 Results from a Missense Mutation Affecting the C-Type Lectin Domain of Aggrecan. *Am. J. Hum. Genet.*  
733 84, 72–79.
- 734 Triche, T.J., Weisenberger, D.J., Van Den Berg, D., Laird, P.W., and Siegmund, K.D. (2013). Low-level  
735 processing of Illumina Infinium DNA Methylation BeadArrays. *Nucleic Acids Res.* 41, e90.
- 736 Trinkaus, E. (2003). Neandertal faces were not long; modern human faces are short. *Proc. Natl. Acad. Sci.*  
737 *U. S. A.* 100, 8142–8145.
- 738 Varanasi, S.S., Olstad, O.K., Swan, D.C., Sanderson, P., Gautvik, V.T., Reppe, S., Francis, R.M., Gautvik,  
739 K.M., and Datta, H.K. (2010). Skeletal site-related variation in human trabecular bone transcriptome and  
740 signaling. *PLoS One* 5.
- 741 Wagner, J.R., Busche, S., Ge, B., Kwan, T., Pastinen, T., and Blanchette, M. (2014). The relationship  
742 between DNA methylation, genetic and expression inter-individual variation in untransformed human  
743 fibroblasts. *Genome Biol.* 15, R37.
- 744 Waki, H., Nakamura, M., Yamauchi, T., Wakabayashi, K. ichi, Yu, J., Hirose-Yotsuya, L., Take, K., Sun,  
745 W., Iwabu, M., Okada-Iwabu, M., et al. (2011). Global mapping of cell type-specific open chromatin by  
746 FAIRE-seq reveals the regulatory role of the NFI family in adipocyte differentiation. *PLoS Genet.* 7.
- 747 Wang, H., Maurano, M.T., Qu, H., Varley, K.E., Gertz, J., Pauli, F., Lee, K., Canfield, T., Weaver, M.,  
748 Sandstrom, R., et al. (2012). Widespread plasticity in CTCF occupancy linked to DNA methylation.  
749 *Genome Res.* 22, 1680–1688.

- 750 Weaver, T.D. (2009). The meaning of Neandertal skeletal morphology. *Proc. Natl. Acad. Sci.* *106*, 16028–  
751 16033.
- 752 Weber, J., and Pusch, C.M. (2008). The lumbar spine in Neanderthals shows natural kyphosis. *Eur. Spine*  
753 *J.* *17*.
- 754 Yan, Y.-L., Willoughby, J., Liu, D., Crump, J.G., Wilson, C., Miller, C.T., Singer, A., Kimmel, C.,  
755 Westerfield, M., and Postlethwait, J.H. (2005). A pair of Sox: distinct and overlapping functions of  
756 zebrafish *sox9* co-orthologs in craniofacial and pectoral fin development. *Development* *132*, 1069–1083.
- 757 Yao, B., Wang, Q., Liu, C.F., Bhattaram, P., Li, W., Mead, T.J., Crish, J.F., and Lefebvre, V. (2015). The  
758 SOX9 upstream region prone to chromosomal aberrations causing campomelic dysplasia contains multiple  
759 cartilage enhancers. *Nucleic Acids Res.* *43*, 5394–5408.
- 760 Zeng, J., Konopka, G., Hunt, B.G., Preuss, T.M., Geschwind, D., and Yi, S. V. (2012). Divergent Whole-  
761 Genome Methylation Maps of Human and Chimpanzee Brains Reveal Epigenetic Basis of Human  
762 Regulatory Evolution. *Am. J. Hum. Genet.* *91*, 455–465.
- 763 Zilberman, U., and Smith, P. (1992). A comparison of tooth structure in Neanderthals and early Homo  
764 sapiens sapiens: a radiographic study. *J. Anal* *180*, 387–393.
- 765 Ziller, M.J., Gu, H., Müller, F., Donaghey, J., Tsai, L.T.-Y., Kohlbacher, O., De Jager, P.L., Rosen, E.D.,  
766 Bennett, D.A., Bernstein, B.E., et al. (2013). Charting a dynamic DNA methylation landscape of the human  
767 genome. *Nature* *500*, 477–481.
- 768
- 769

## 770 Acknowledgements

771 We would like to thank Sagiv Shifman, Yoel Rak, Philip Lieberman, Rodrigo Lacruz, Erella  
772 Hovers, Anna Belfer-Cohen, Achinoam Blau, and Daniel Lieberman for their useful advice, Janet  
773 Kelso for providing data, and Maayan Harel for illustrations. L.C and E.M are supported by the  
774 Israel Science Foundation FIRST individual grant (ISF 1430/13). D.G. is supported by the Clore  
775 Israel Foundation. D.R. is an Investigator of the Howard Hughes Medical Institute and is also  
776 supported by an Allen Discovery Center for the Study of Human Brain Evolution funded the Paul  
777 G. Allen Family Foundation. S.P. and K.P. were supported by ERC grant (No 694707) and the  
778 Max Planck Society. C.L.-F. is supported by FEDER and BFU2015-64699-P grant from the  
779 Spanish government. R.P. was supported by ERC starting grant ADNABIOARC (263441).  
780 Funding for the collection and processing of the 850K chimp data was provided by the Leakey  
781 Foundation Research Grant for Doctoral Students, Wenner-Gren Foundation Dissertation  
782 Fieldwork Grant (Gr. 9310), James F. Nacey Fellowship from the Nacey Maggioncalda  
783 Foundation, International Primatological Society Research Grant, Sigma Xi Grant-in-Aid of  
784 Research, Center for Evolution and Medicine Venture Fund (ASU), Graduate Research and  
785 Support Program Grant (GPSA, ASU), and Graduate Student Research Grant (SHESC, ASU) to  
786 G.H. Collection of the chimpanzee bone from Tanzania was funded by the Jane Goodall Institute,  
787 and grants from the US National Institutes of Health (AI 058715) and National Science Foundation  
788 (IOS-1052693), and facilitated by Elizabeth Lonsdorf and Beatrice Hahn.

789

## 790 Tables and Figures

791 **Table 1.** DMRs in genes affecting the voice and larynx.

| DMG     | Associated phenotype                              | Chr | DMR start | DMR end   |
|---------|---------------------------------------------------|-----|-----------|-----------|
| ALPL    | Abnormality of the voice                          | 1   | 21901961  | 21907487  |
| AHDC1   | Laryngomalacia                                    | 1   | 27869253  | 27871400  |
| AHDC1   | Laryngomalacia                                    | 1   | 27917471  | 27921806  |
| SATB2   | Abnormality of the voice                          | 2   | 200236735 | 200244763 |
| SPEG    | Dysphonia                                         | 2   | 220316303 | 220319764 |
| COLQ    | Weak cry                                          | 3   | 15508914  | 15512536  |
| TGFBR2  | Abnormality of the voice                          | 3   | 30649533  | 30658854  |
| TGFBR2  | Abnormality of the voice                          | 3   | 30674279  | 30680742  |
| TGFBR2  | Abnormality of the voice                          | 3   | 30706167  | 30710950  |
| POC1A   | High pitched voice                                | 3   | 52110680  | 52112683  |
| PLXND1  | Abnormality of the voice                          | 3   | 129312022 | 129315078 |
| SH3BP2  | Abnormality of the voice                          | 4   | 2796208   | 2800983   |
| SDHA    | Hoarse voice, loss of voice, vocal cord paralysis | 5   | 251676    | 254993    |
| GLI3    | Laryngeal cleft                                   | 7   | 42212811  | 42214593  |
| CHD7    | Abnormality of the voice, Laryngomalacia          | 8   | 61679558  | 61684133  |
| COL2A1  | Backwards displacement of the tongue base         | 12  | 48362098  | 48394211  |
| HNRNPA1 | Bowing of the vocal cords, hoarse voice           | 12  | 54679251  | 54682731  |
| TRPV4   | Vocal cord paresis                                | 12  | 110248589 | 110250088 |
| MEIS2   | Laryngomalacia                                    | 15  | 37217518  | 37219852  |
| ACAN    | Hoarse voice                                      | 15  | 89333945  | 89344957  |
| CREBBP  | Laryngomalacia                                    | 16  | 3828787   | 3834862   |
| CREBBP  | Laryngomalacia                                    | 16  | 3891316   | 3900883   |
| XYLT1   | High-pitched voice                                | 16  | 17428938  | 17431410  |
| WWOX    | Abnormality of the voice                          | 16  | 78707061  | 78709972  |
| SOX9    | Laryngomalacia                                    | 17  | 70077734  | 70113643  |
| SOX9    | Laryngomalacia                                    | 17  | 70119247  | 70120418  |
| GNAL    | Laryngeal dystonia                                | 18  | 11747116  | 11748993  |
| NFIX    | Laryngomalacia                                    | 19  | 13155588  | 13158871  |

|       |                                                   |    |          |          |
|-------|---------------------------------------------------|----|----------|----------|
| NFIX  | Laryngomalacia                                    | 19 | 13185658 | 13192650 |
| POLD1 | High-pitched voice                                | 19 | 50883926 | 50885758 |
| RIN2  | High-pitched voice                                | 20 | 19944783 | 19947262 |
| PI4KA | Difficulties in speaking, chewing, and swallowing | 22 | 21102507 | 21105410 |

792

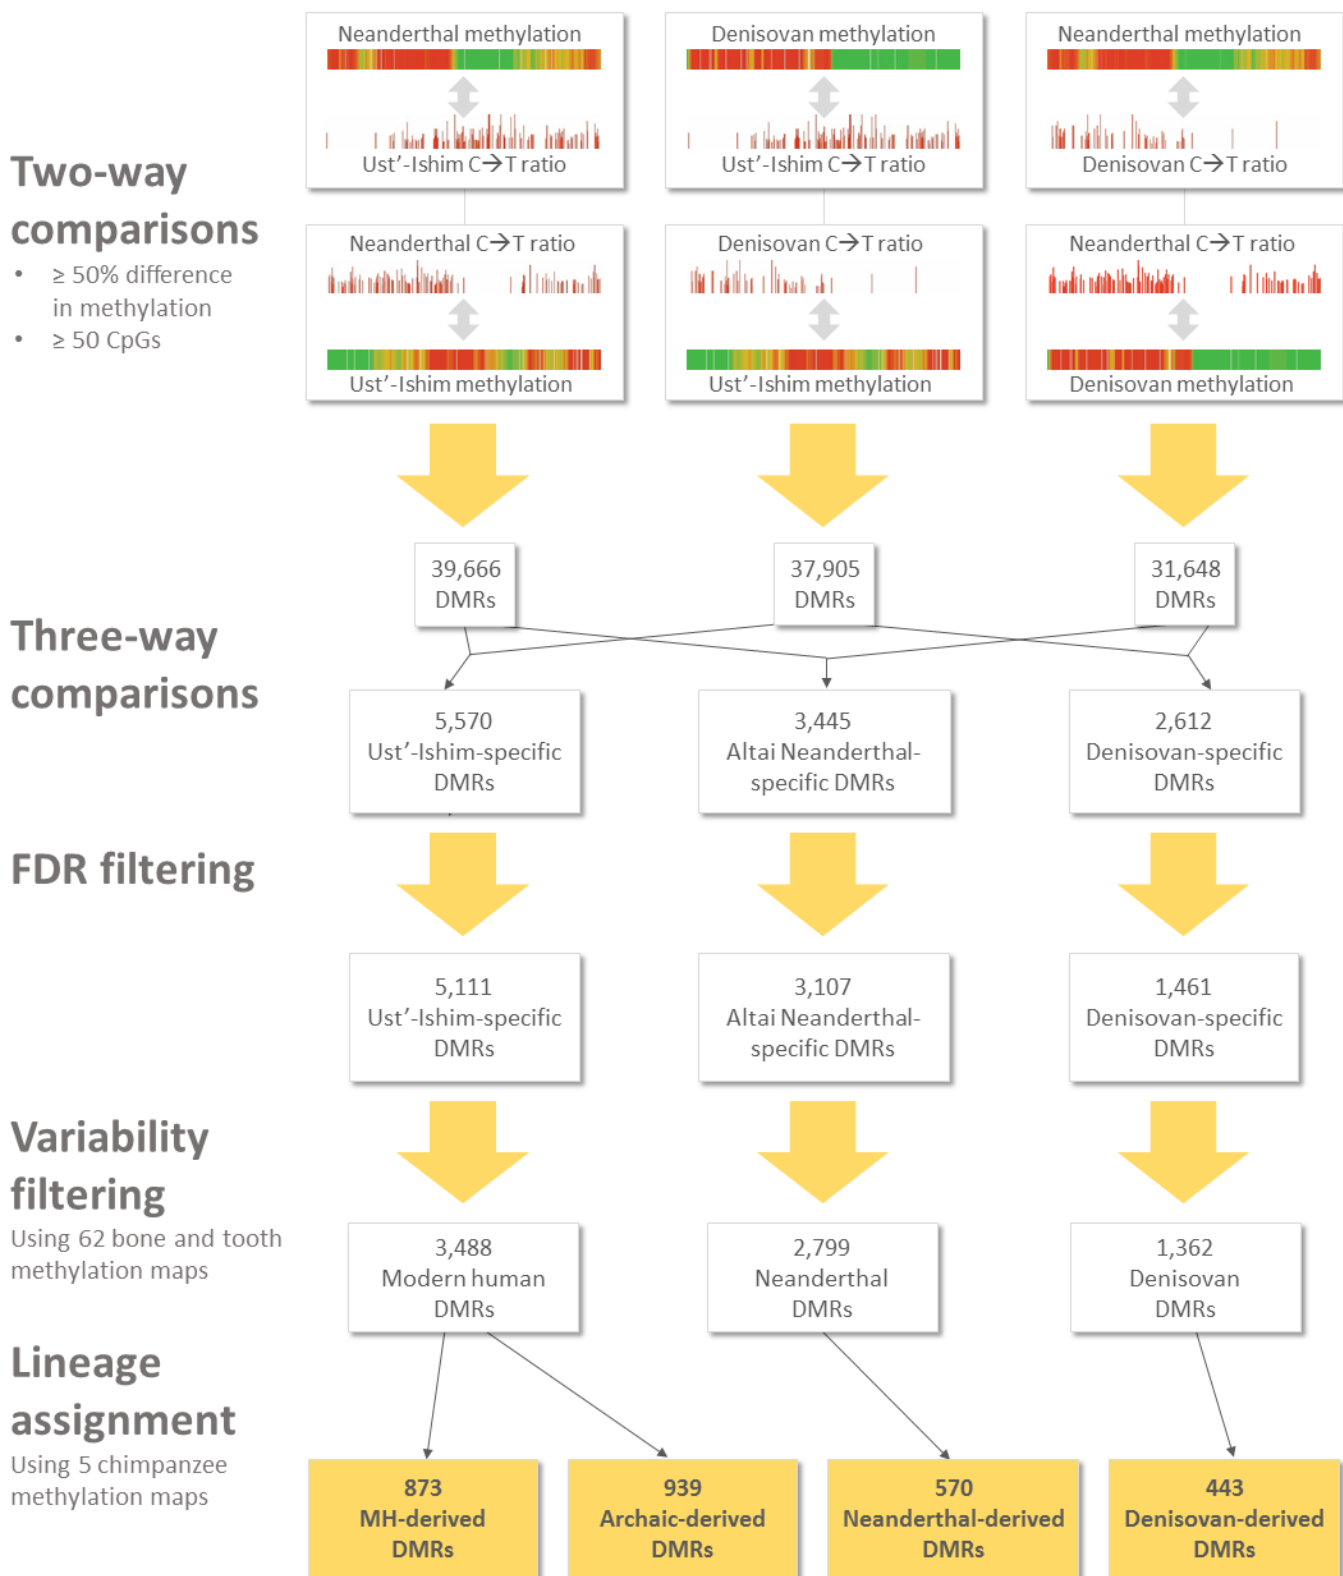

794 **Figure 1. DMR-detection flowchart.** At the core of the process are six two-way (pairwise)  
795 comparisons between the Altai Neanderthal, Denisovan, and Ust'-Ishim individuals. In each two-  
796 way comparison, a C→T deamination signal of one hominin was compared to the reconstructed  
797 methylation map of the other hominin. This resulted in three lists of pairwise DMRs, that were  
798 then intersected to identify hominin-specific DMRs, defined as DMRs that appear in two of the  
799 lists. False discovery rates were controlled by running 100 simulations for each hominin, each  
800 simulating the processes of deamination, methylation reconstruction, and DMR-detection. Only  
801 DMRs that passed FDR thresholds of  $< 0.05$  were kept (see Methods). To discard non-evolutionary  
802 DMRs we used 62 skeletal methylation maps, and kept only loci whose methylation levels differed  
803 in one lineage, regardless of age, bone type, disease or sex. Finally, five chimpanzee methylation  
804 maps were used to assign the lineage in which each DMR likely emerged.



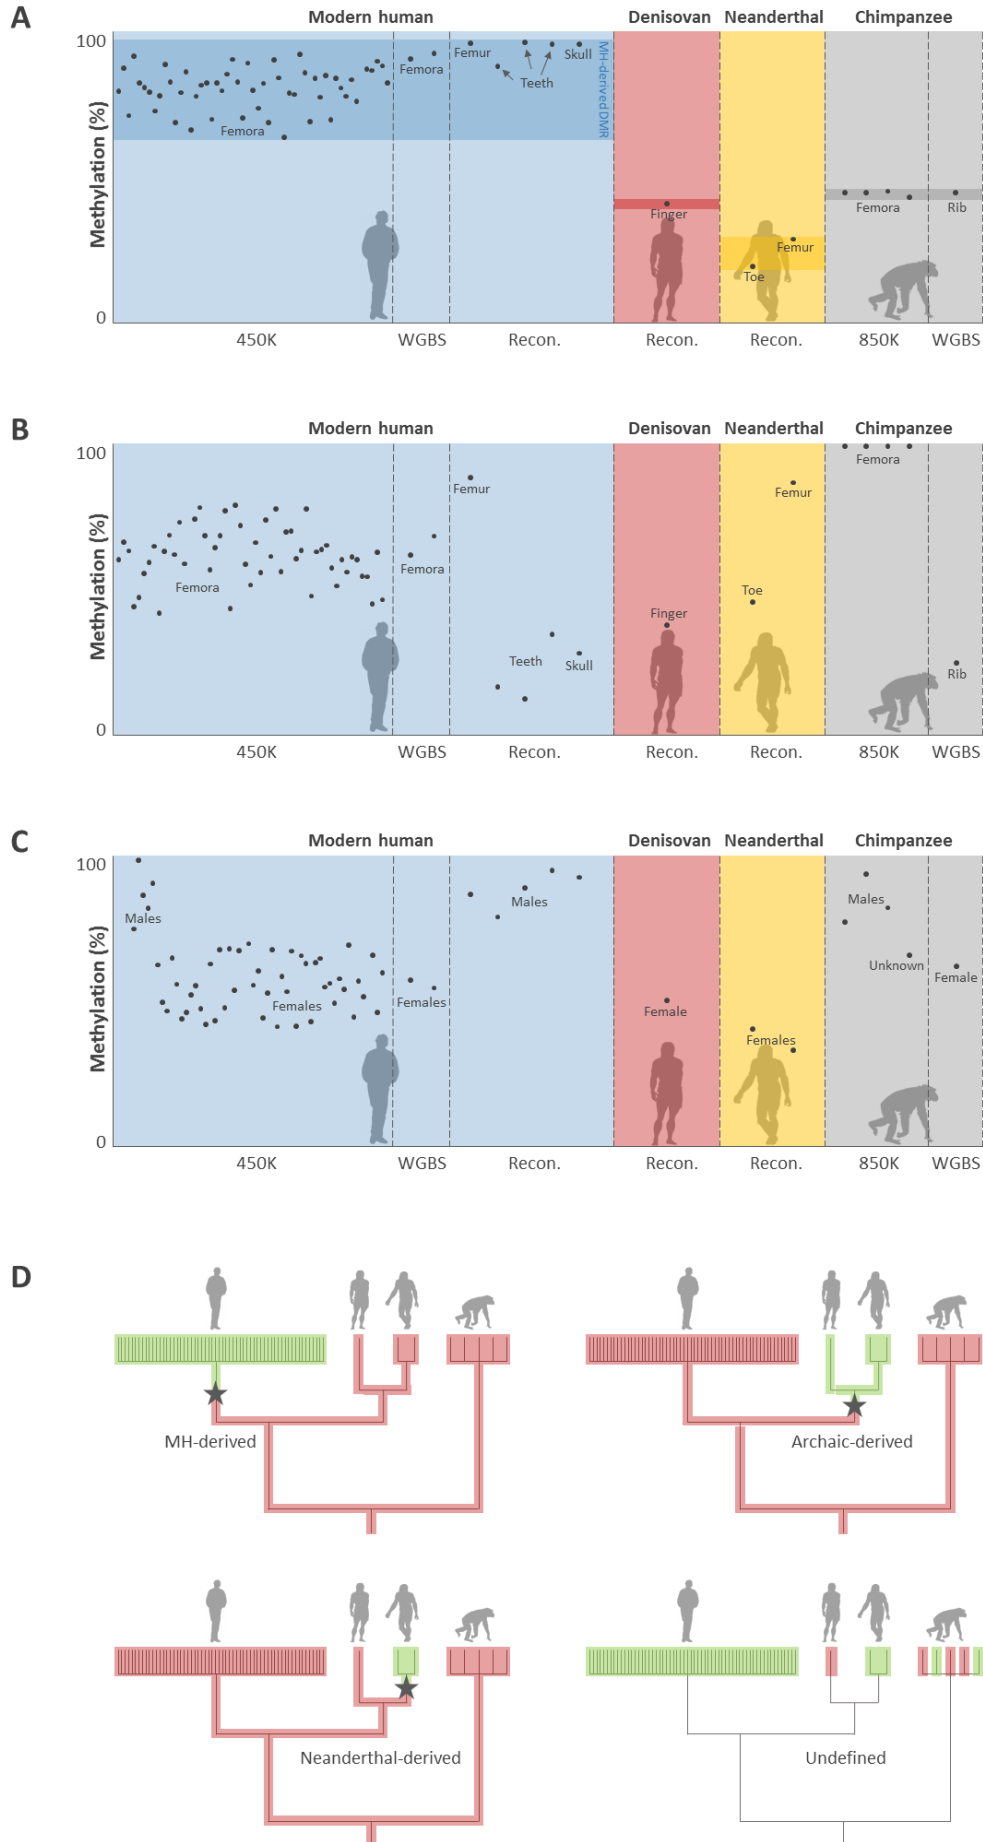

806 **Figure 2. Variability filtering and lineage assignment.** **A.** Methylation levels across MH,  
807 Denisovan, Neanderthal, and chimpanzee samples in DMR#278 (chr4: 38,014,896-38,016,197)  
808 located in the gene body of *TBC1D1*. This is an example of an evolutionary DMR, defined as a  
809 locus in which all 59 MH samples are found outside the range of methylation across archaic  
810 humans. RRBS samples were not used in the filtering step due to their tendency to sample  
811 unmethylated positions. Chimpanzee samples were used during the following step of lineage  
812 assignment. **B.** A putative limb-specific DMR (chr3:14,339,371-14,339,823) which was removed  
813 from the analysis, as it does not comply with our definition of evolutionary DMR. Femur, toe, and  
814 finger samples are hypermethylated compared to other skeletal elements. Toe and finger are found  
815 at the bottom range of limb samples, suggesting some variation in this locus within limb samples  
816 too. **C.** A putative sex-specific DMR (chr3:72,394,336-72,396,901) which was removed from the  
817 analysis, as it does not comply with our definition of evolutionary DMR. Males are  
818 hypermethylated compared to females. **D.** Lineage assignment using chimpanzee samples. Each  
819 bar at the tree leaves represents a sample. Methylation levels are marked with red and green,  
820 representing methylated and unmethylated samples, respectively. Only DMRs that passed the  
821 previous variability filtering steps were analyzed. The lineage where the methylation change has  
822 likely occurred (by parsimony) is marked by a star. For example, DMRs where chimpanzees  
823 cluster closer to archaic samples were defined as MH-derived.

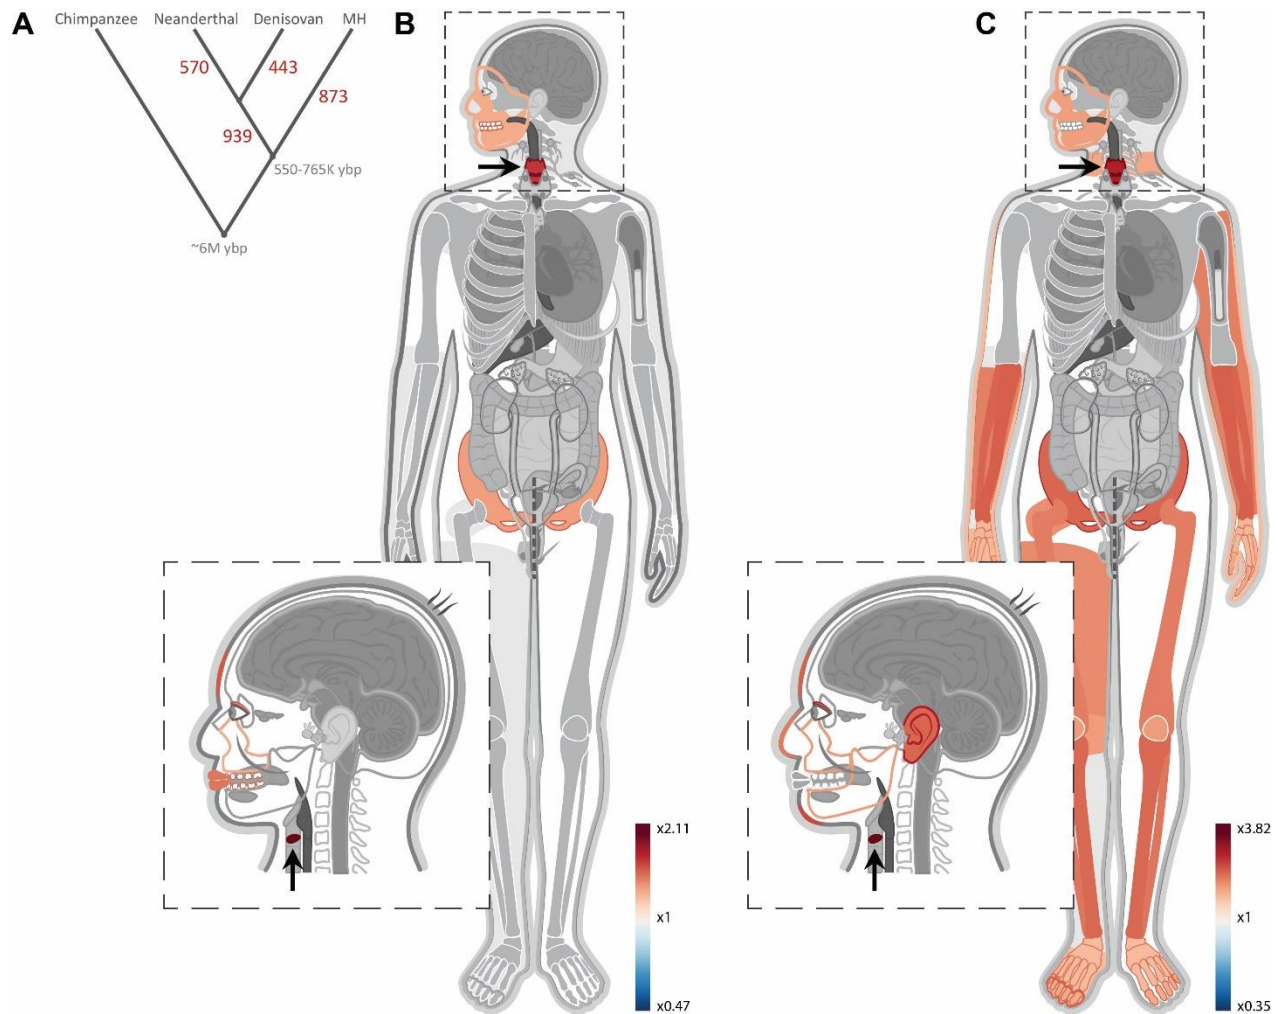

824

825 **Figure 3. Genes affecting voice and face are the most over-represented within MH-derived**

826 **DMRs. A.** The number of DMRs that emerged along each of the human branches. Split times are

827 in years before present (ybp). **B.** A heat map representing the level of enrichment of each

828 anatomical part within the MH-derived DMRs. Only body parts that are significantly enriched

829 (FDR < 0.05) are colored. Three skeletal parts are significantly over-represented: the face, pelvis,

830 and voice box (larynx, marked with arrows). **C.** Enrichment levels of anatomical parts within the

831 most significant (top quartile) MH-derived DMRs, showing a more pronounced enrichment of

832 genes affecting vocal and facial anatomy.

833

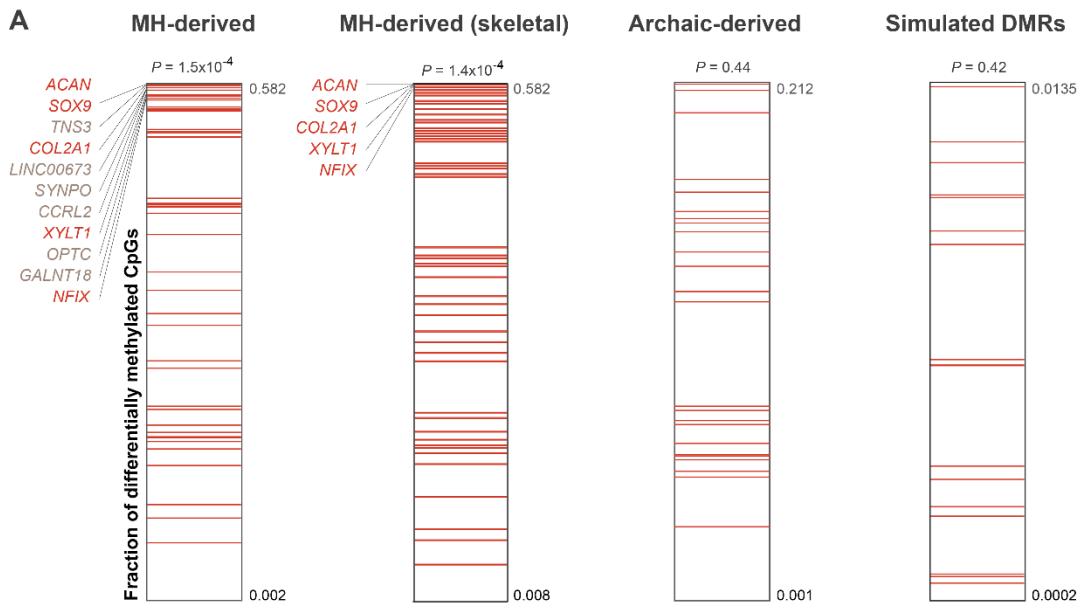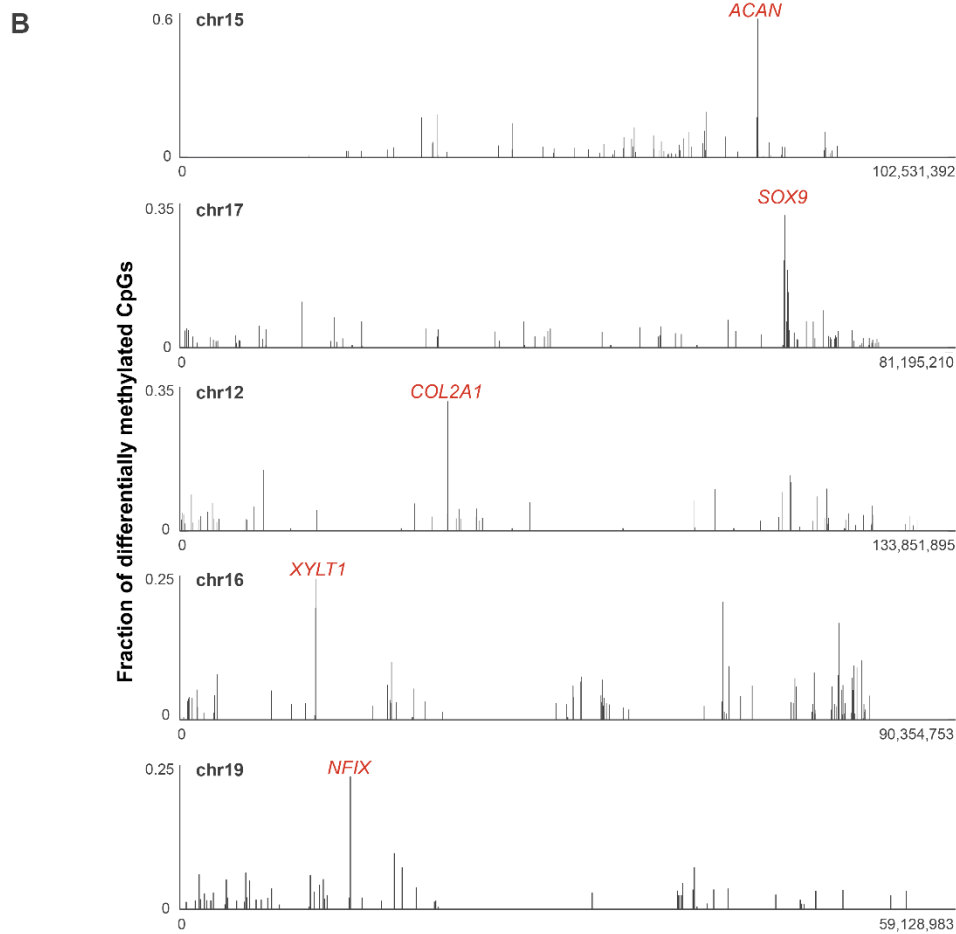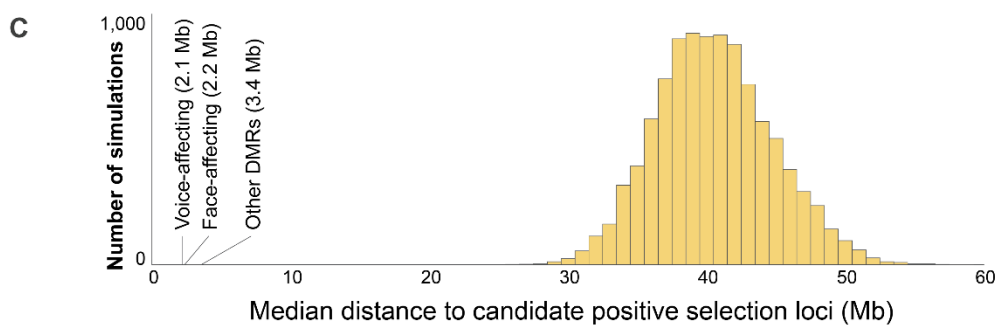

835 **Figure 4. The extent of differential methylation is highest among genes affecting the voice.**

836 **A.** The fraction of differentially methylated CpG positions was computed as the number of MH-  
837 derived CpGs per 100 kb centered around the middle of each DMR. Genes were ranked according  
838 to the fraction of derived CpG positions within them. Genes affecting the voice are marked with  
839 red lines. MH-derived DMGs which affect the voice tend to be ranked significantly higher.  
840 Although these genes comprise less than 2% of the genome, three of the top five MH-derived  
841 DMGs, and all top five skeleton-related MH-derived DMGs affect the voice. In archaic-derived  
842 DMRs and in simulated DMRs, voice-affecting genes do not show higher ranking compared to the  
843 rest of the DMGs. **B.** The fraction of differentially methylated CpGs along the five chromosomes  
844 containing *ACAN*, *SOX9*, *COL2A1*, *XYLT1*, and *NFIX*. In each of these chromosomes, the most  
845 extensive changes are found within the genes *COL2A1*, *SOX9*, *ACAN*, and *NFIX*. All of these  
846 genes control facial projection and the development of the larynx. **C.** Mean distance of randomized  
847 DMRs to putative selective sweep regions (Peyr gne et al., 2017). Each DMR was allocated a  
848 random genomic position, while keeping its original length. This was repeated for 10,000  
849 iterations. DMRs tend to be found significantly closer to putative selective sweep regions than  
850 expected by chance. DMRs in voice- and face-affecting genes tend to be 2x closer to such regions  
851 compared to other DMRs.

852

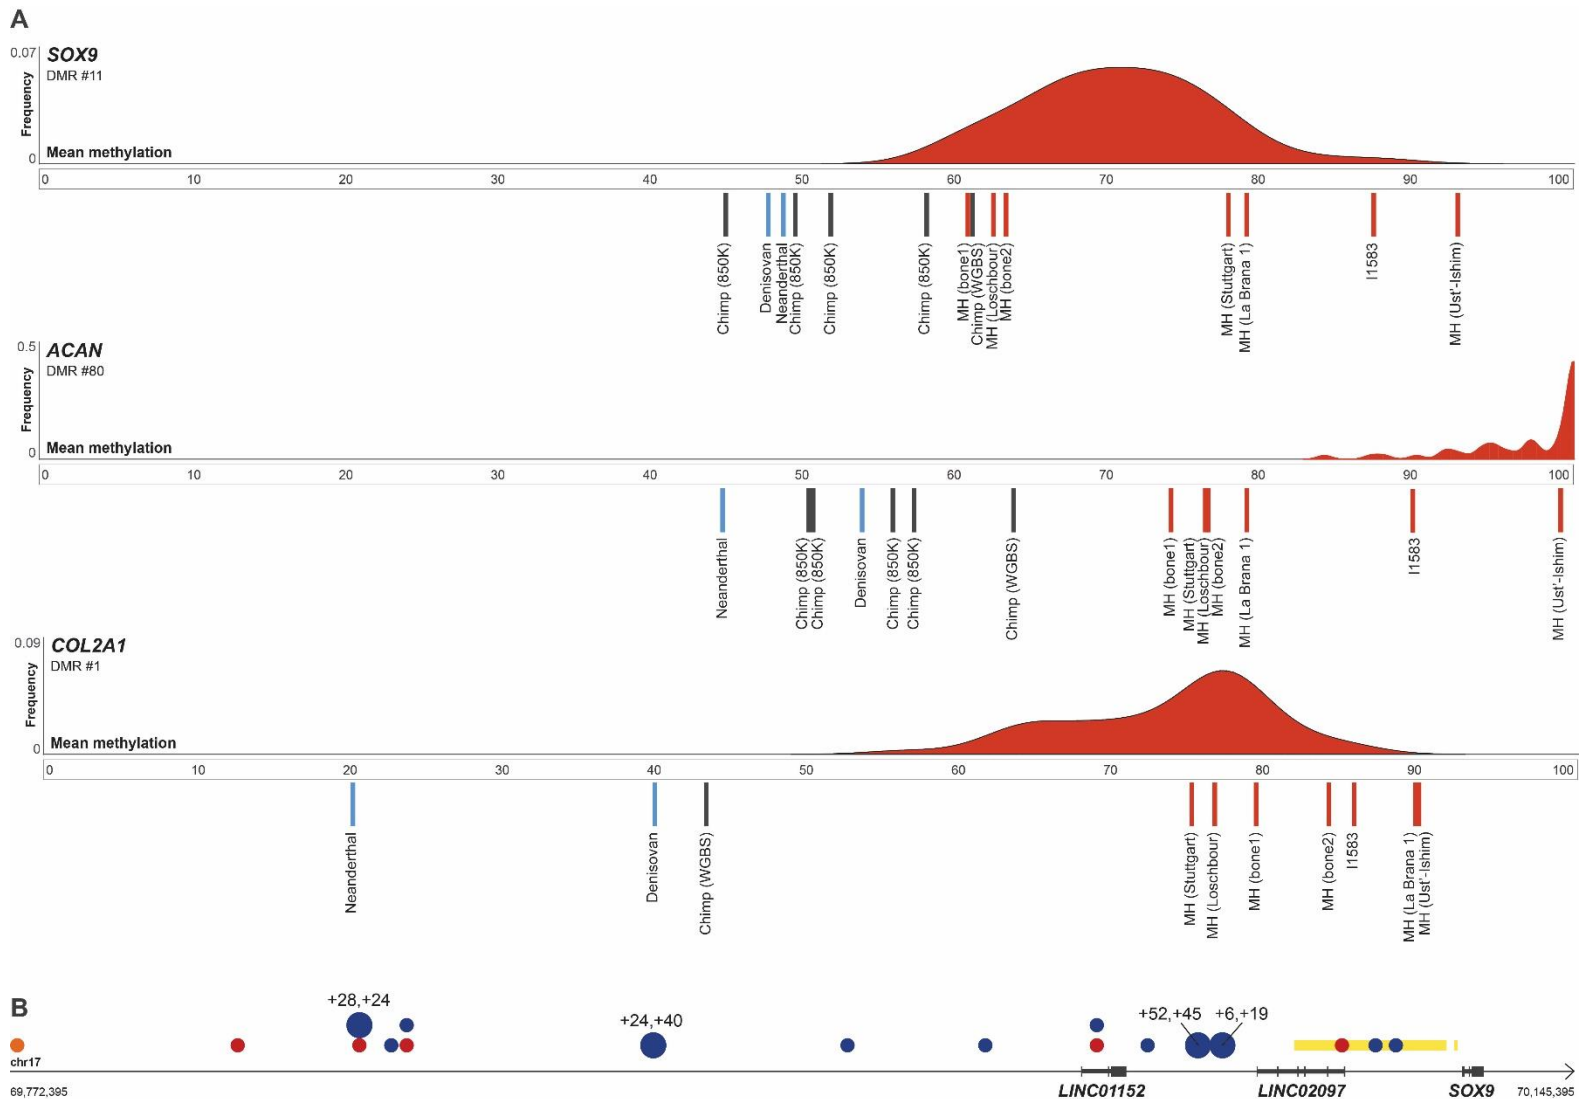

854 **Figure 5. Hypermethylation of *SOX9*, *ACAN*, and *COL2A1* in MHs.** **A.** Methylation levels in  
 855 the MH-derived DMRs in *SOX9*, *ACAN*, and *COL2A1*. MH samples are marked with red lines,  
 856 archaic human samples are marked with blue lines and chimpanzee samples are marked with grey  
 857 lines. The distribution of methylation across 52 MH samples (450K methylation arrays) is  
 858 presented as a red distribution. **B.** *SOX9* and its upstream regulatory elements. MH-derived DMRs  
 859 are marked with yellow rectangles, enhancers identified in humans are marked with red dots, and  
 860 enhancers identified in mice are marked with blue dots. Enhancers which were shown to be active  
 861 in skeletal tissues (mainly cartilage) are marked with large dots, and a putative enhancer that bears

862 active histone marks in chimpanzee, but not in modern humans is marked with an orange dot.  
863 Numbers above skeletal enhancers show the difference in mean bone methylation between MHs  
864 and archaic humans (left) and between MHs and chimpanzee (right). Across all four enhancers,  
865 MHs are hypermethylated compared to archaic humans and the chimpanzee.

866



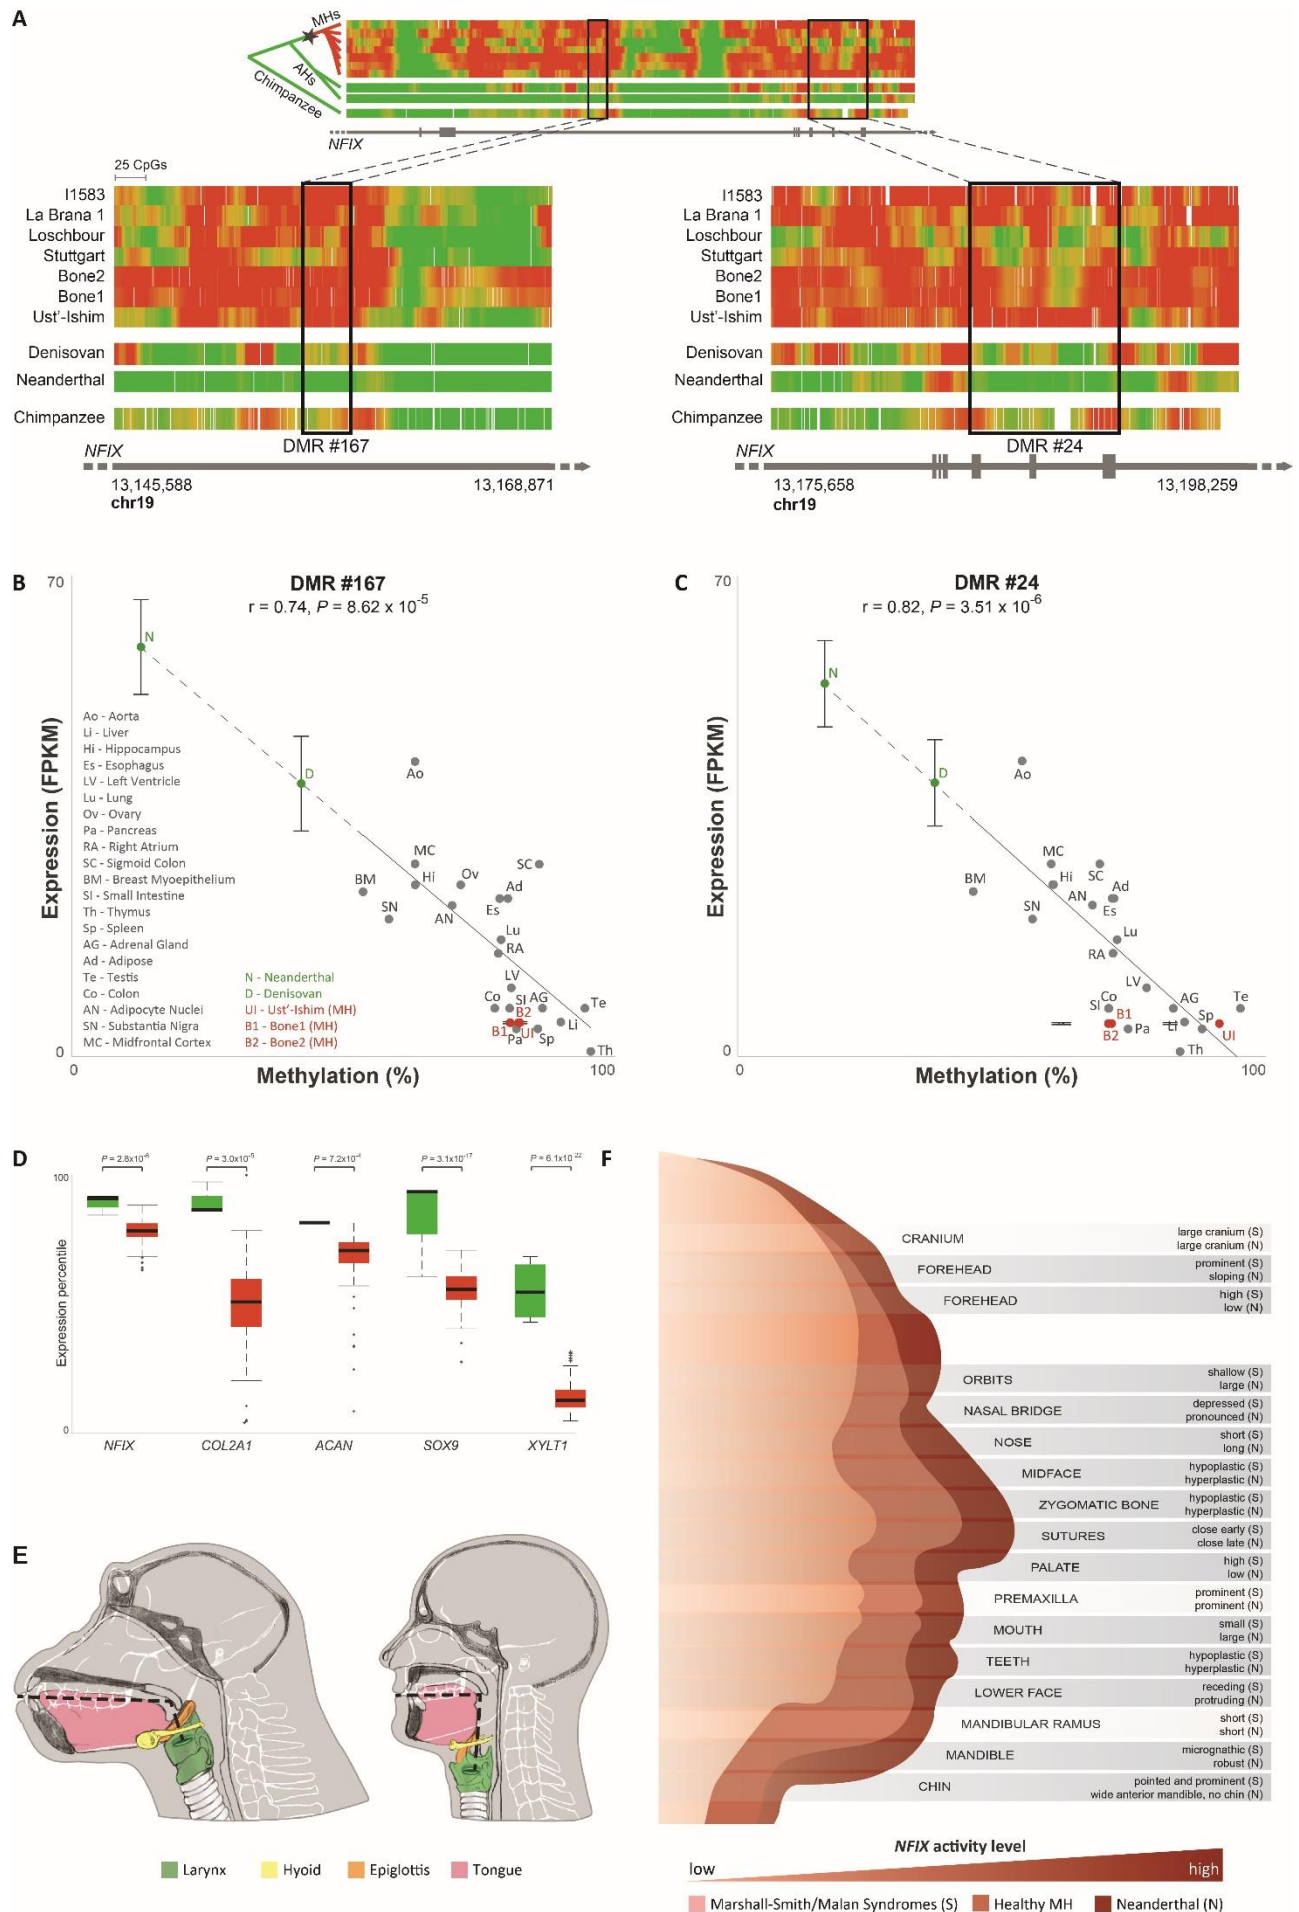



868 **Figure 6. *NFIX* became down-regulated after the split from archaic humans. A.** Methylation  
869 levels along *NFIX*, color-coded from green (unmethylated) to red (methylated). In each of the two  
870 panels, the top seven bars show ancient and present-day MH samples, where *NFIX* is mostly  
871 methylated. The bottom three maps describe the Denisovan, Neanderthal (archaic humans, AHs),  
872 and chimpanzee, where the gene is mostly unmethylated. Methylation levels around the two MH-  
873 derived DMRs (#24 and #167) are shown in the zoomed-in panels. These two DMRs represent the  
874 regions where the most significant methylation changes are observed, but hypermethylation of  
875 *NFIX* in MHs can be seen throughout the entire gene body. Chimpanzee and present-day samples  
876 were smoothed using the same sliding window as in ancient samples to allow easier comparison.  
877 The inferred schematic regulatory evolution of *NFIX* is shown using a phylogenetic tree to the left  
878 of the top panel. Star marks the shift in methylation from unmethylated (green) to methylated (red).  
879 **B,C.** Methylation levels in DMRs #167 and #24 vs. expression levels of *NFIX* across 21 MH  
880 tissues (grey). In both DMRs, higher methylation is associated with lower expression of *NFIX*.  
881 Ust'-Ishim, Bone1 and Bone2 methylation levels (red) are plotted against mean *NFIX* expression  
882 from four present-day bones. Neanderthal and Denisovan methylation levels (green) are plotted  
883 against the predicted expression levels, based on the extrapolated regression line (dashed). Error  
884 bars represent one standard deviation in each direction. **D.** Expression levels of *SOX9*, *ACAN*,  
885 *COL2A1* and *NFIX* in modern humans are reduced compared to mice. The box plots present 89  
886 human samples (red) and four mouse samples (green) from appendicular bones (limbs and pelvis).  
887 Expression levels were converted to percentiles, based on the level of gene expression compared  
888 to the rest of the genome in each sample. **E.** Vocal anatomy of chimpanzee and MH. The vocal  
889 tract is the cavity from the lips to the larynx (marked by dashed lines). In MHs, the flattening of  
890 the face together with the descent of the larynx led to approximately 1:1 proportions of the

891 horizontal and vertical portions of the vocal tract, whereas chimpanzees have a longer horizontal  
892 and a shorter vertical vocal tract. **F.** Craniofacial features of the Neanderthal (posterior silhouette),  
893 healthy MH (middle silhouette), and MH with Marshall-Smith or Malan syndromes (anterior  
894 silhouette). *NFIX* controls the upper vs. lower prognathism of the face. Individuals where *NFIX* is  
895 partially or completely inactive present phenotypes that are largely the opposite of the Neanderthal  
896 facial features. For each facial part we show the phenotype of the Marshall-Smith and Malan  
897 syndromes (S), as well as the corresponding Neanderthal (N) phenotype. Phenotypes are compared  
898 to a healthy MH. Opposite phenotypes are marked with dark grey rectangles, and shared  
899 phenotypes are marked with light grey rectangles.

## 900 Supplementary Figures

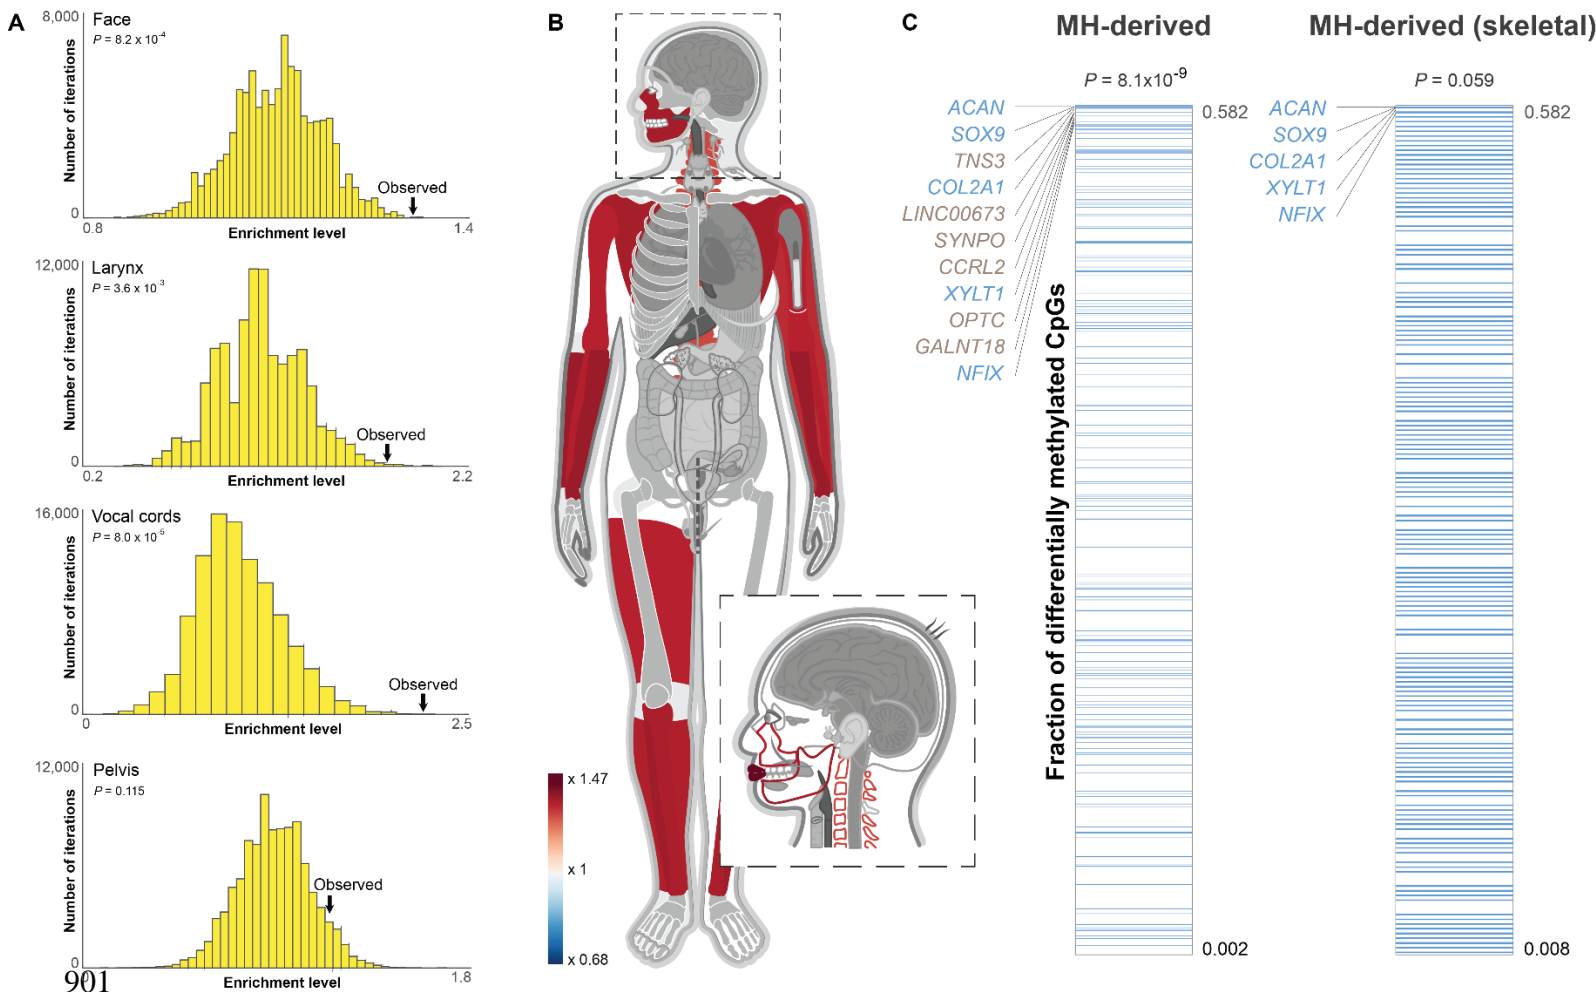

902 **Figure S1. The face and larynx are enriched within MH-derived DMGs compared to genes**  
 903 **affecting the skeleton, and compared to archaic-derived DMGs. A.** The distribution of  
 904 enrichment levels in 100,000 randomized lists of genes, where non-skeletal MH-derived DMGs  
 905 were unchanged, whereas skeleton-related DMGs were replaced with random skeleton-related  
 906 genes. Observed enrichment levels are significantly higher than expected in the face, larynx, and  
 907 vocal cords. **B.** A heat map representing the level of enrichment of each anatomical part within  
 908 archaic-derived DMGs. Genes affecting the lips, limbs, jaws, scapula, and spinal column are the  
 909 most enriched within archaic-derived DMRs. Only body parts that are significantly enriched

910 (FDR < 0.05) are colored. **C.** The number of MH-derived CpGs per 100 kb centered around the  
911 middle of each DMR. Genes were ranked according to the fraction of derived CpG positions  
912 within them. Genes affecting the face are marked with blue lines. MH-derived DMGs which  
913 affect the face tend to be ranked significantly higher. Although only ~2% of genes in the genome  
914 are known to affect lower and midfacial projection, three of the top five MH-derived DMGs, and  
915 all top five MH-derived skeleton-affecting DMGs affect facial projection.

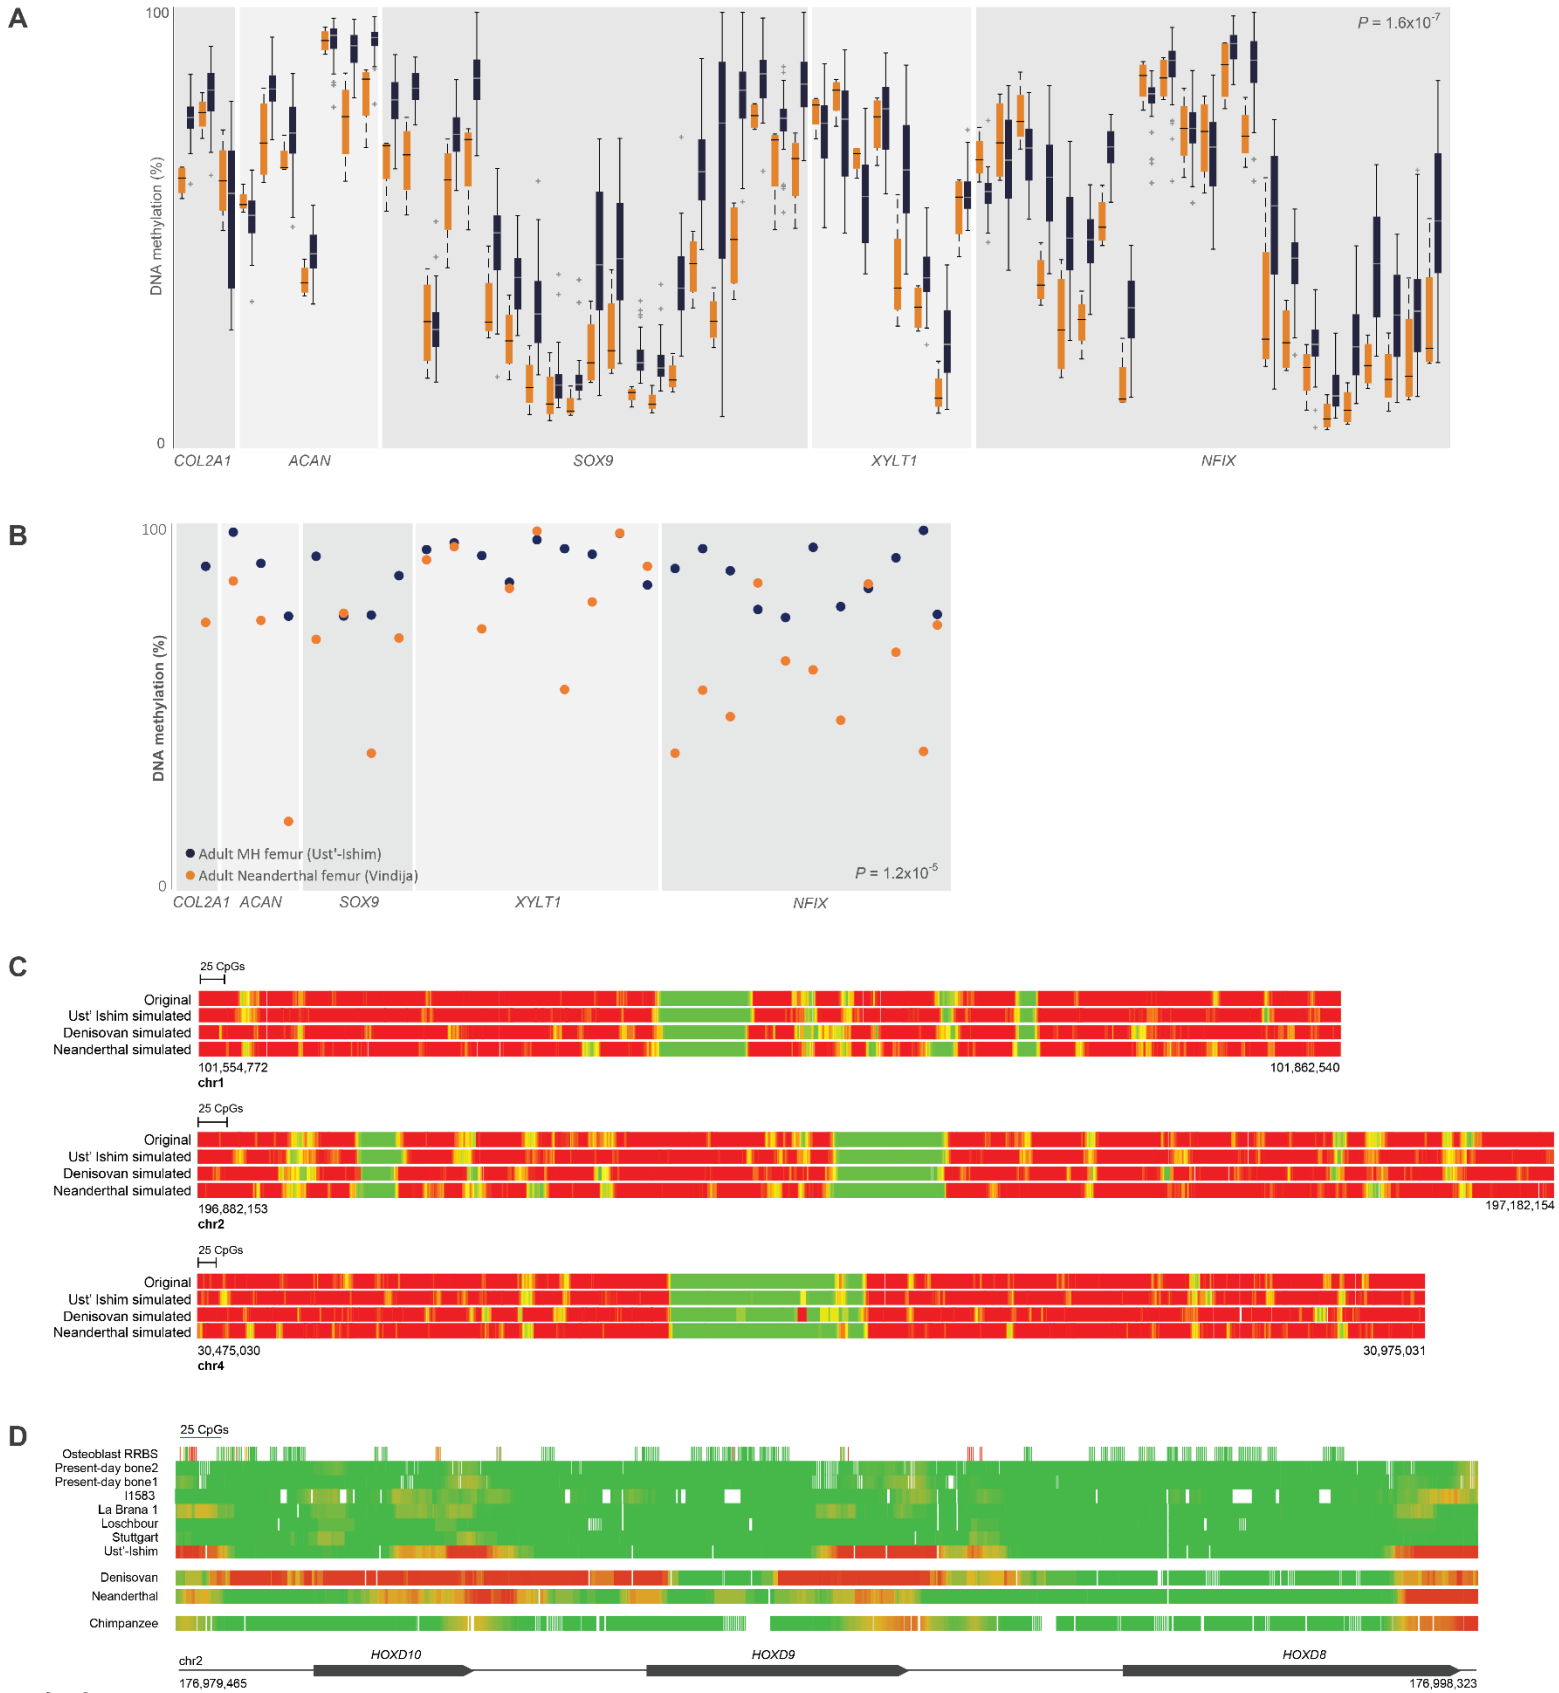

917 **Figure S2. A.** *COL2A1*, *ACAN*, *SOX9*, and *NFIX* are hypermethylated in MH femora compared to  
918 chimpanzee femora. Each pair of box plots represents methylation levels across 52 MH femora  
919 (blue) and four chimpanzee femora (orange) in a single probe of methylation array. When  
920 comparing methylation in the same bone, measured by the same technology, and across the same  
921 positions, MHs show almost consistent hypermethylation compared to chimpanzee. The probes  
922 presented include also probes within DMRs that were analyzed in the density analyses (see  
923 Methods). **B.** *COL2A1*, *ACAN*, *SOX9*, and *NFIX* are hypermethylated in Ust'-Ishim (blue)  
924 compared to the Vindija Neanderthal (orange). Dots represent mean methylation levels in MH-  
925 derived DMRs. Both samples were extracted from femora of adults, and methylation was  
926 reconstructed using the same method. The DMRs presented include also those that were analyzed  
927 in the density analyses (see Methods). The hypermethylation of these genes in MHs is unlikely to  
928 be attributed to age or bone type. **C.** Simulations of cytosine deamination, followed by  
929 reconstruction reproduce DNA methylation maps. Deamination was simulated for each position  
930 based on its methylation level, read coverage and the observed rate of deamination in each  
931 hominin. Then, DNA methylation maps were reconstructed and matched against the original map.  
932 The number of DMRs found were used as an estimate of false discovery rate. Three exemplary  
933 regions are presented, where methylation levels are color-coded from green (unmethylated) to red  
934 (methylated). **D.** The *HOXD* cluster is hypermethylated in archaic humans, and in the Ust'-Ishim  
935 individual. Methylation levels are color-coded from green (unmethylated) to red (methylated). The  
936 top eight bars show ancient and present-day MH samples, the lower three show the Denisovan,  
937 Neanderthal and chimpanzee. The promoter region of *HOXD9* is hypermethylated in the  
938 Neanderthal and the Denisovan, but not in MHs. The 3' ends of the three genes are

939 hypermethylated in the Neanderthal, Denisovan, Ust'-Ishim and chimpanzee, but not in other MH  
940 samples. The promoter of HOXD10 is methylated only in the Denisovan.

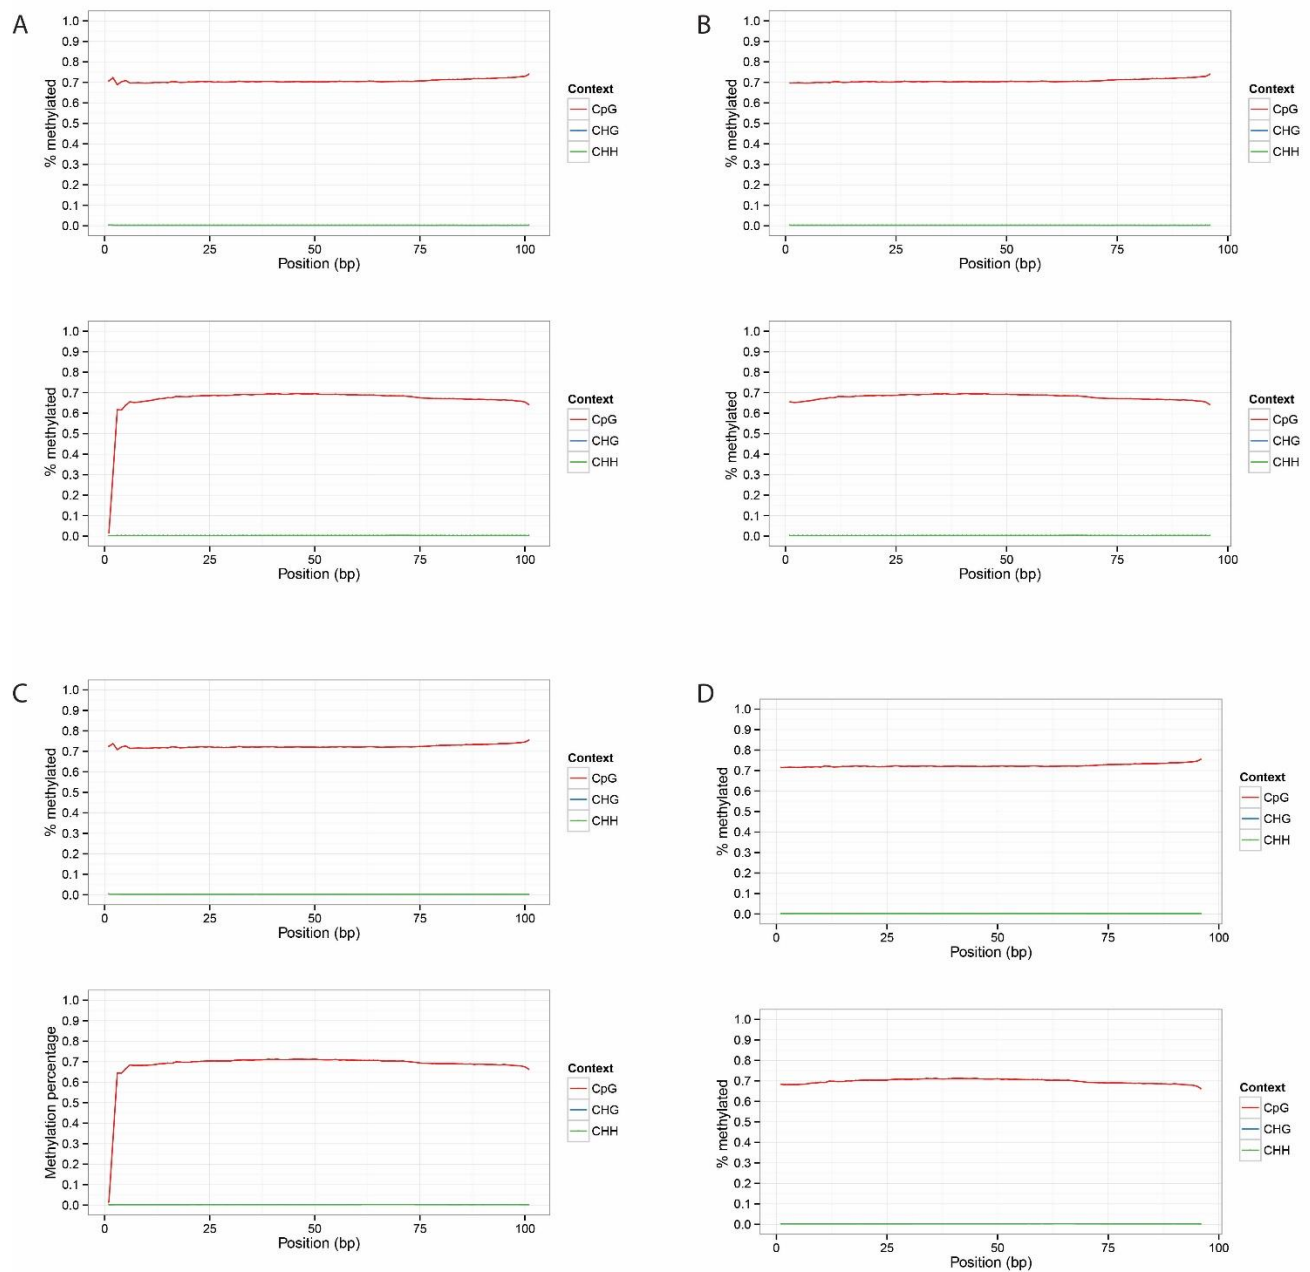

941

942 **Figure S3. M-bias plots along reads in bone sample 1 and sample 2. A. Pre-filtering**  
943 **methylation along read1 and read2 in the autosomes of bone 1. B. Post-filtering methylation along**  
944 **read1 and read2 in the autosomes of bone 1. C. Pre-filtering methylation along read1 and read2 in**  
945 **the autosomes of bone 2. D. Post-filtering methylation along read1 and read2 in the autosomes of**  
946 **bone 2.**



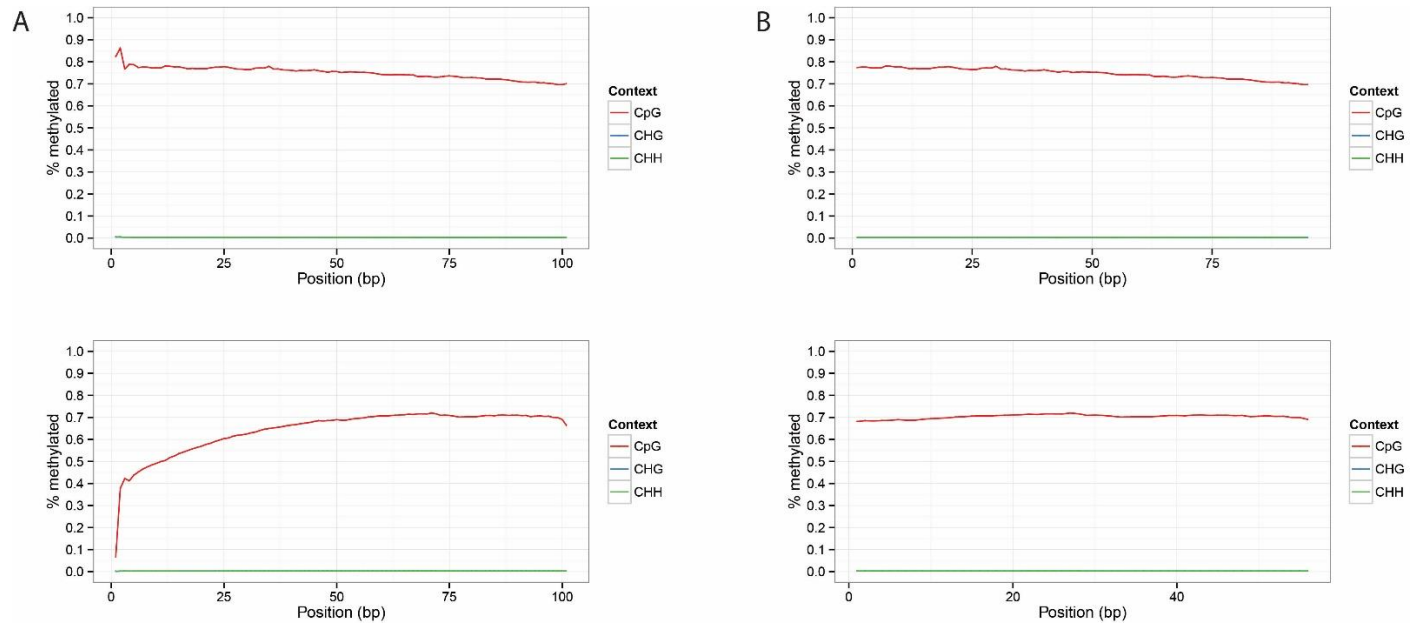

947

948 **Figure S4. M-bias plots along reads in the chimpanzee rib sample. A.** Pre-filtering methylation

949 along read1 and read2 in the autosomes. **B.** Post-filtering methylation along read1 and read2 in the

950 autosomes.
