# Supplementary material for: Genes Affecting Vocal and Facial Anatomy Went Through Extensive Regulatory Divergence in Modern Humans
Source: bioRxiv or medRxiv preprint supplement (doi:10.1101/106955), 2019-09-24
Supplement: Supplementary file [file 106955-8.pdf]

| <b>Extraction</b> | <b>Mg used</b> | <b>ug/mL</b> | <b>Volume in uL</b> | <b>Total ug</b> |
|-------------------|----------------|--------------|---------------------|-----------------|
| Extraction 1      | 50             | 1.28         | 115                 | 0.1472          |
| Extraction 2      | 100            | 2.51         | 115                 | 0.2886          |
| Extraction 3      | 100            | 1.8          | 115                 | 0.2162          |
| Blank control 1   | n/a            | <0.010 ug/mL | 115                 | 0               |
| Blank control 2   | n/a            | <0.010 ug/mL | 115                 | 0               |

**Table S8. DNA extractions from chimpanzee femurs.**

---

| <b>Animal</b> |                |            |                 |                 |                 |
|---------------|----------------|------------|-----------------|-----------------|-----------------|
| <b>ID</b>     | <b>Species</b> | <b>Sex</b> | <b>Age (yr)</b> | <b>Array ID</b> | <b>Position</b> |
| 4X0523        | chimpanzee     | male       | 10.20           | 200670680029    | R02C01          |
| 4X0406        | chimpanzee     | male       | 10.26           | 200665030025    | R07C01          |
| 4X0387        | chimpanzee     | male       | 13.46           | 200705360064    | R07C01          |
| 4-0191        | chimpanzee     | unknown    | unknown         | 200705860055    | R05C01          |

---

**Table S10. Chimpanzee methylation array samples.**
